# Supplementary material for: A tandem Heck–aza-Michael addition protocol for the one-pot synthesis of isoindolines from unprotected amines
Source: Royal Society of Chemistry journal article supplement (doi:10.1039/c2ob25854d), 2012-01-01

# **A Tandem Heck- aza-Michael Addition Protocol for the One-Pot Synthesis of Isoindolines from Unprotected Amines**

**Ke Chen and Sumod A. Pullarkat\***

*Division of Chemistry and Biological Chemistry, School of Physical & Mathematical Sciences, Nanyang*

*Technological University, Singapore 637371, Singapore, E-mail: [sumod@ntu.edu.sg](mailto:sumod@ntu.edu.sg); Tel: +65-63168906*

## **Supporting Information**

### **Contents**

<sup>1</sup>H and <sup>13</sup>C NMR Spectra for **8, 10, 11, 12** S2-S25

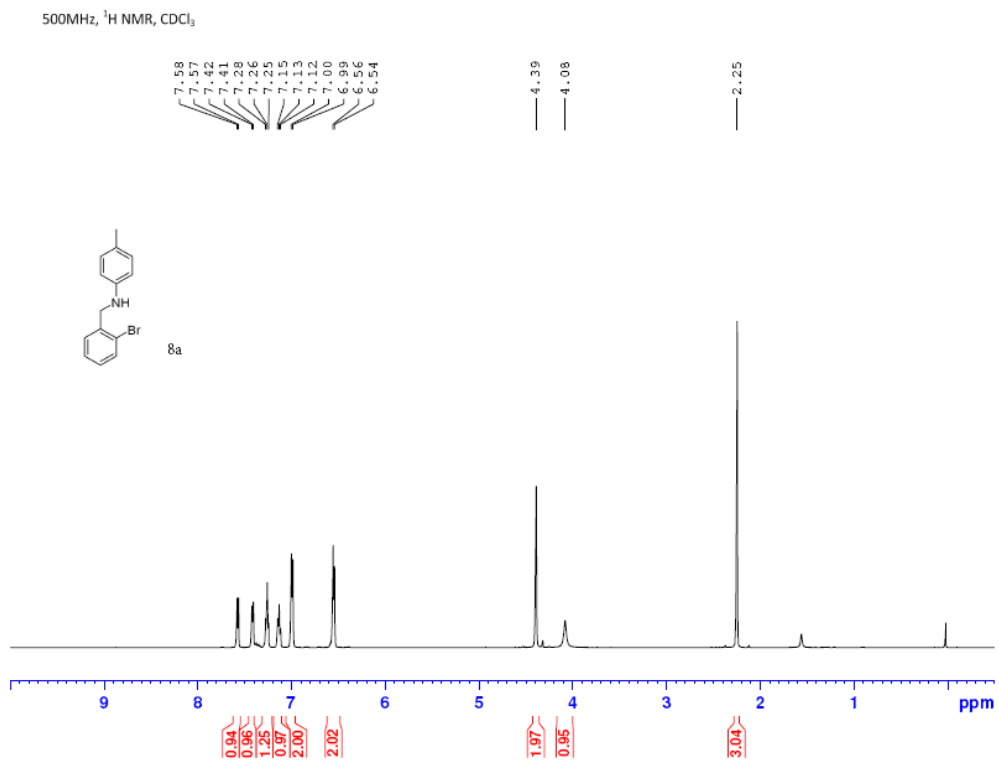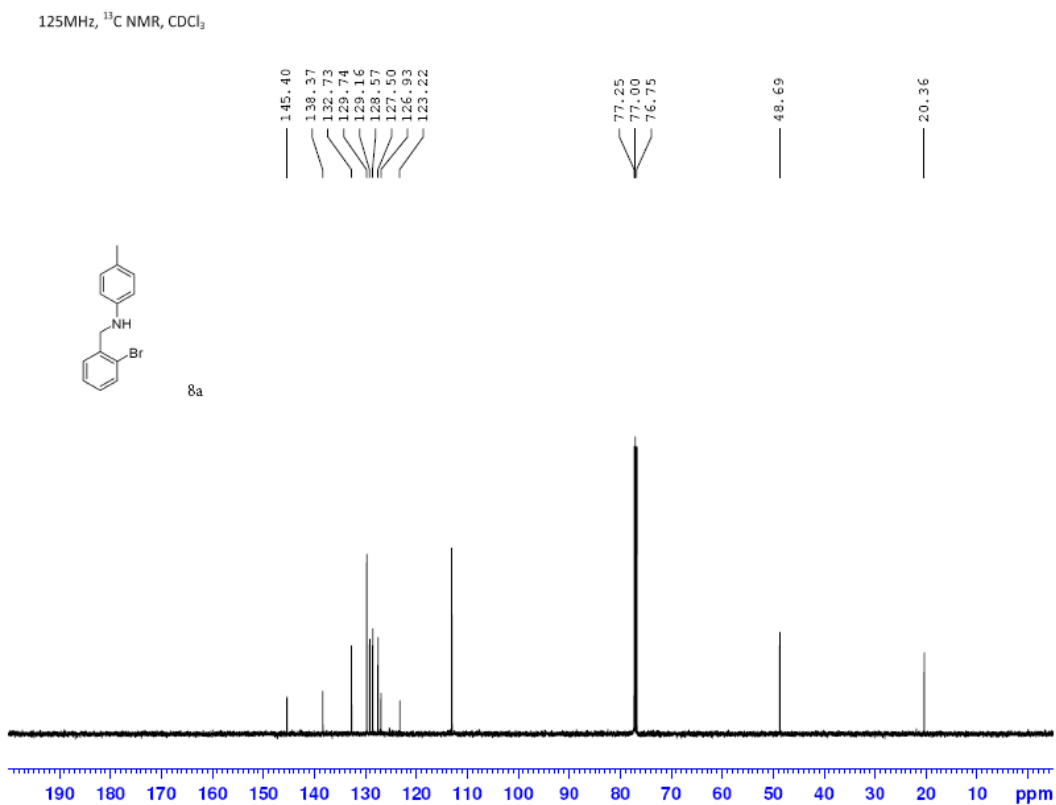

400MHz, <sup>1</sup>H NMR, CDCl<sub>3</sub>

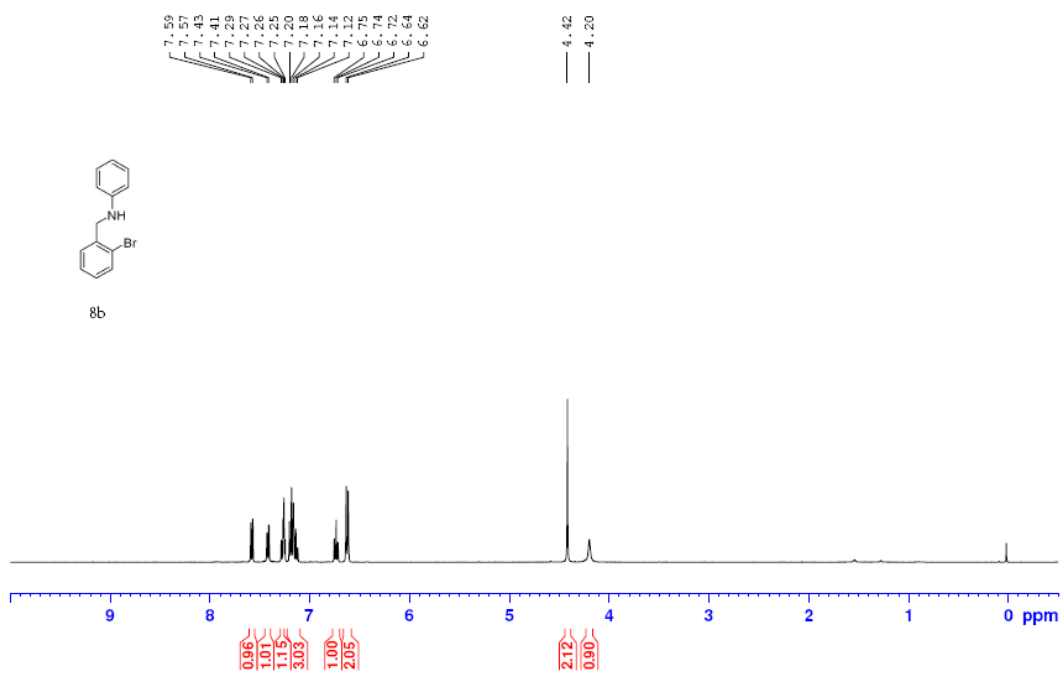

100MHz, <sup>13</sup>C NMR, CDCl<sub>3</sub>

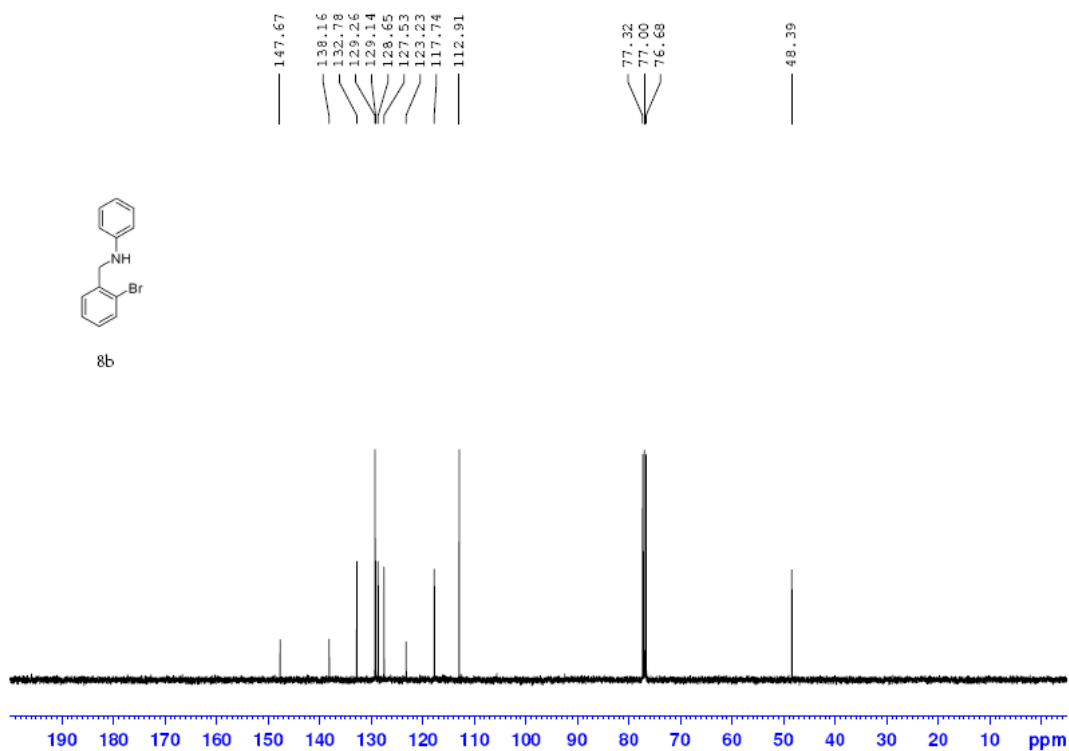

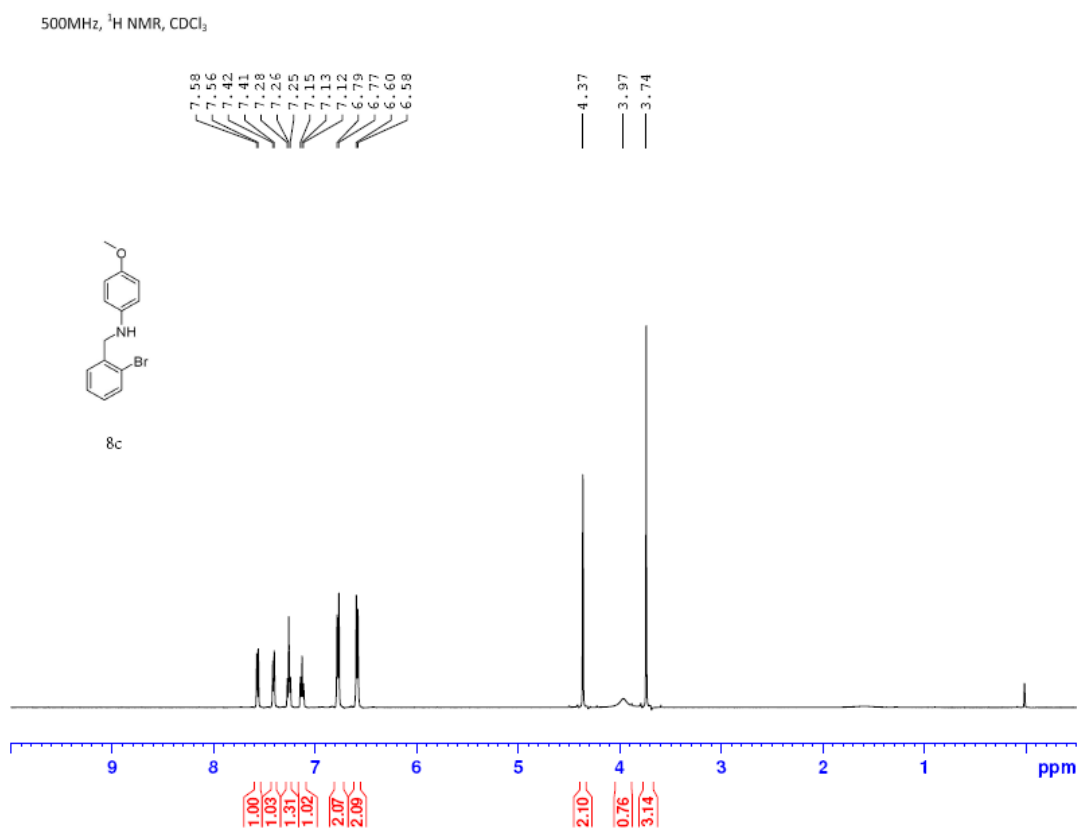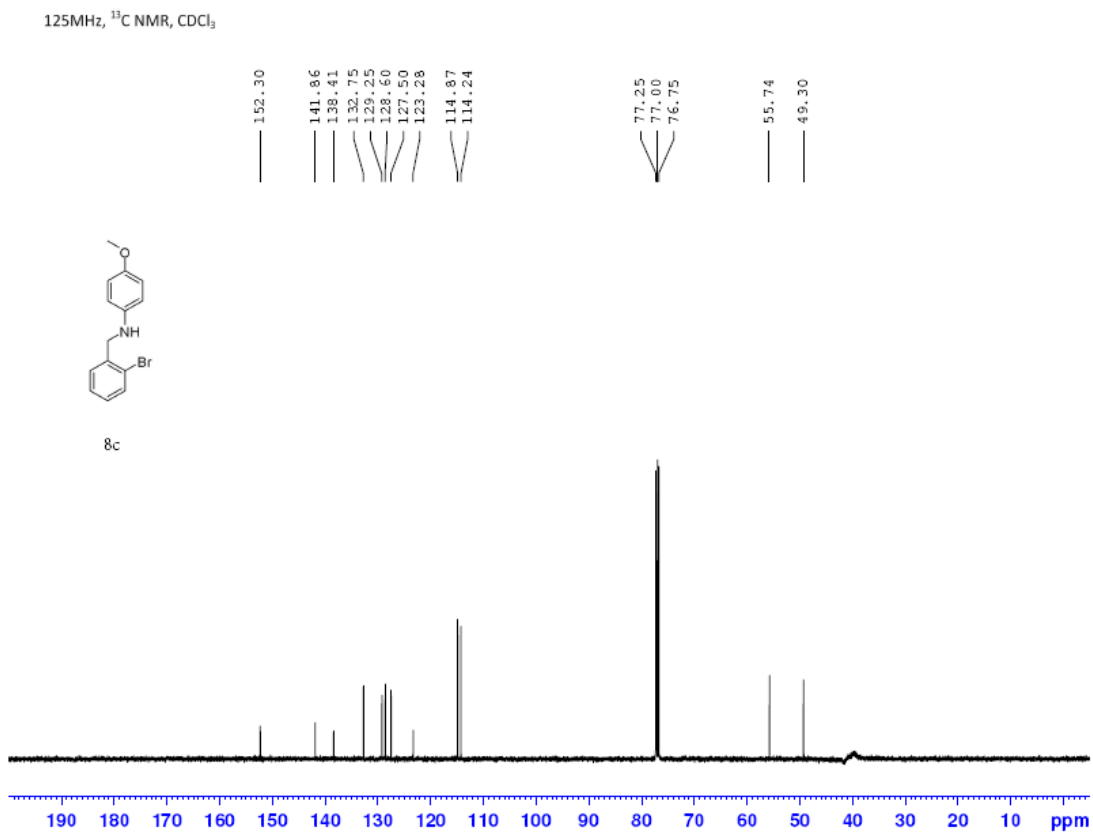

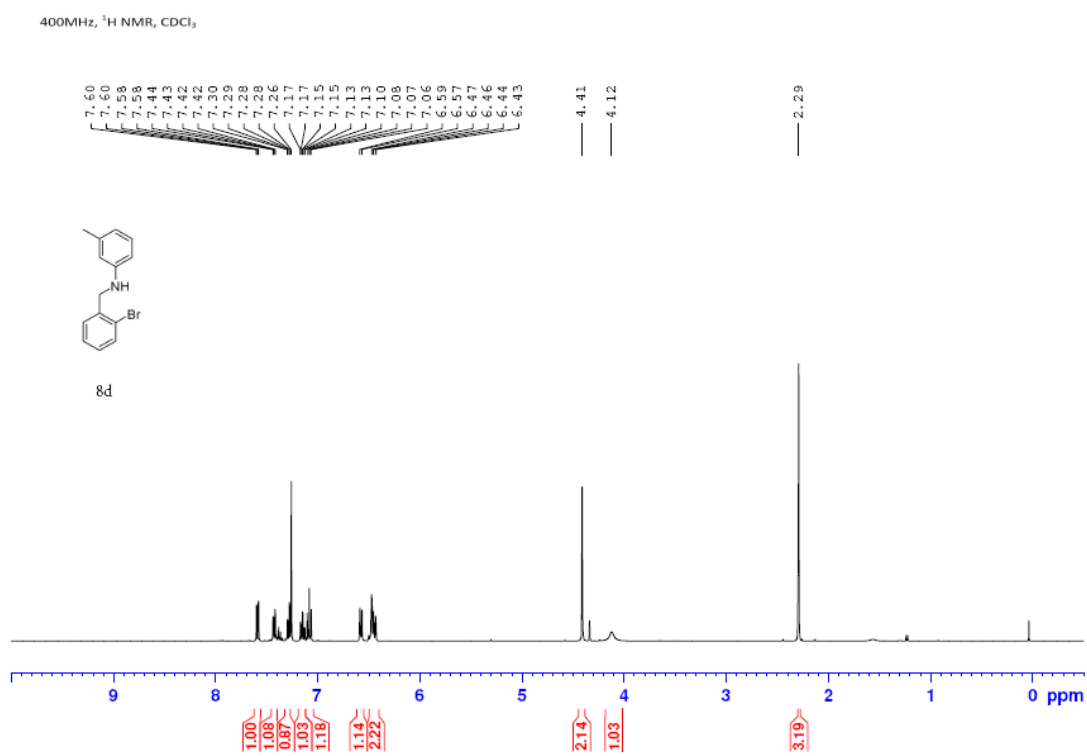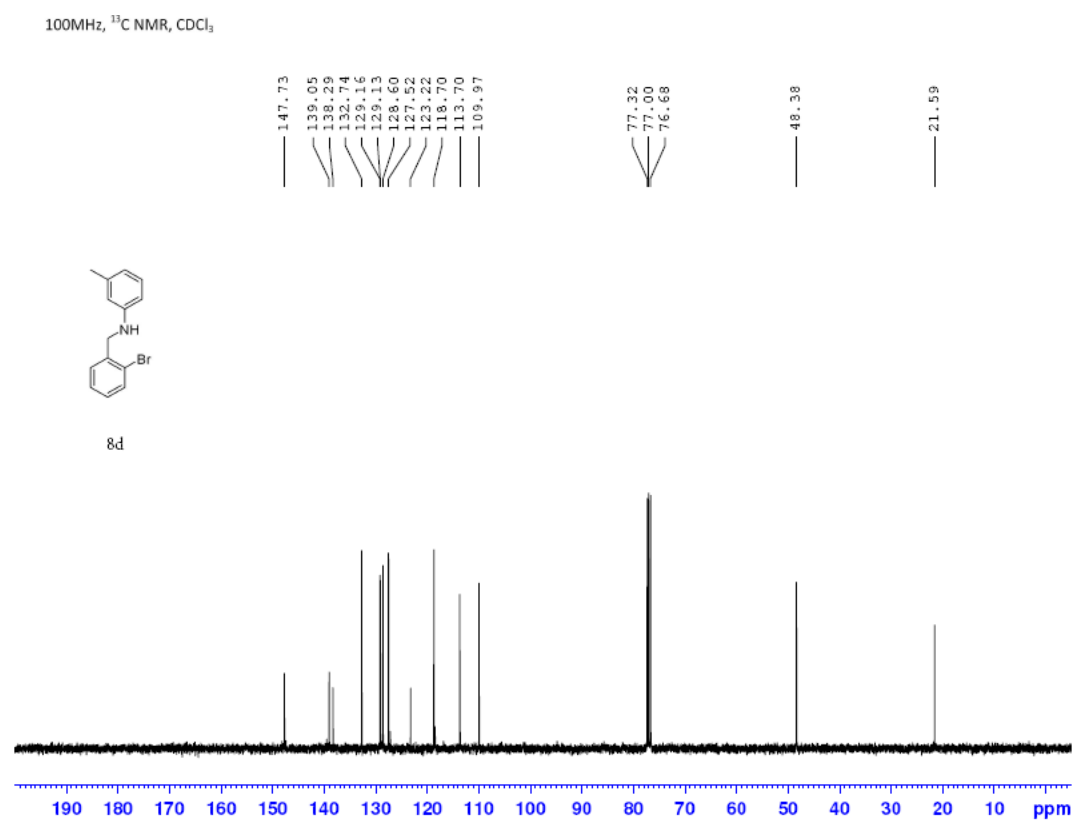

400MHz,  $^1\text{H}$  NMR,  $\text{CDCl}_3$

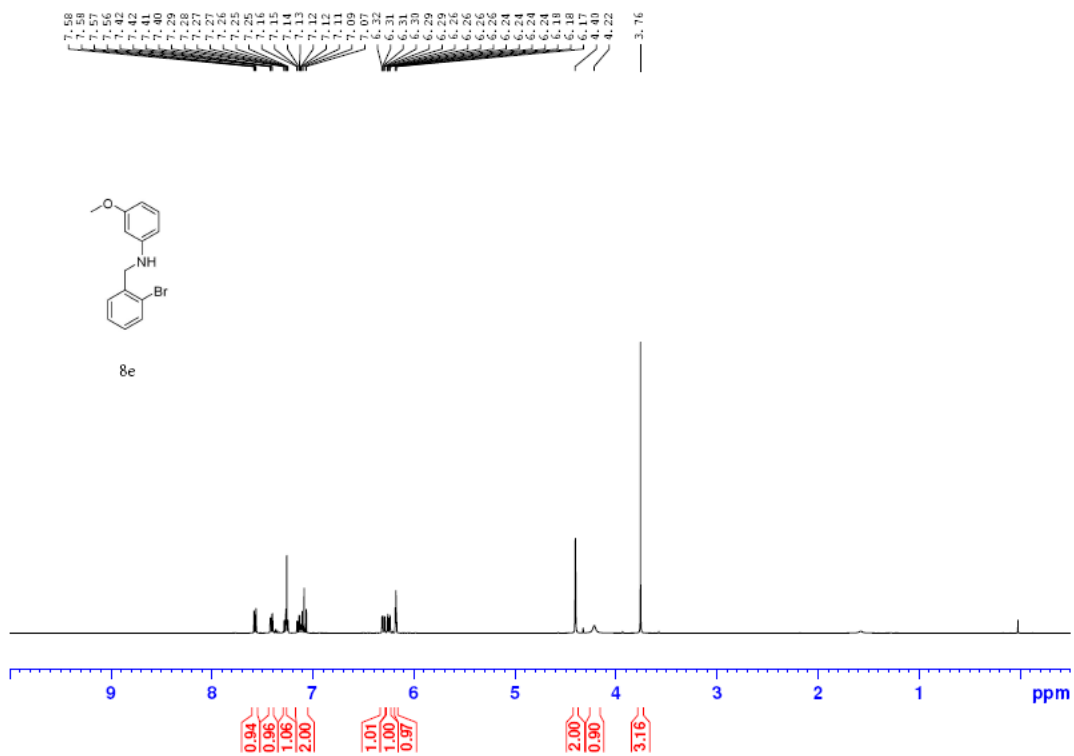

100MHz,  $^{13}\text{C}$  NMR,  $\text{CDCl}_3$

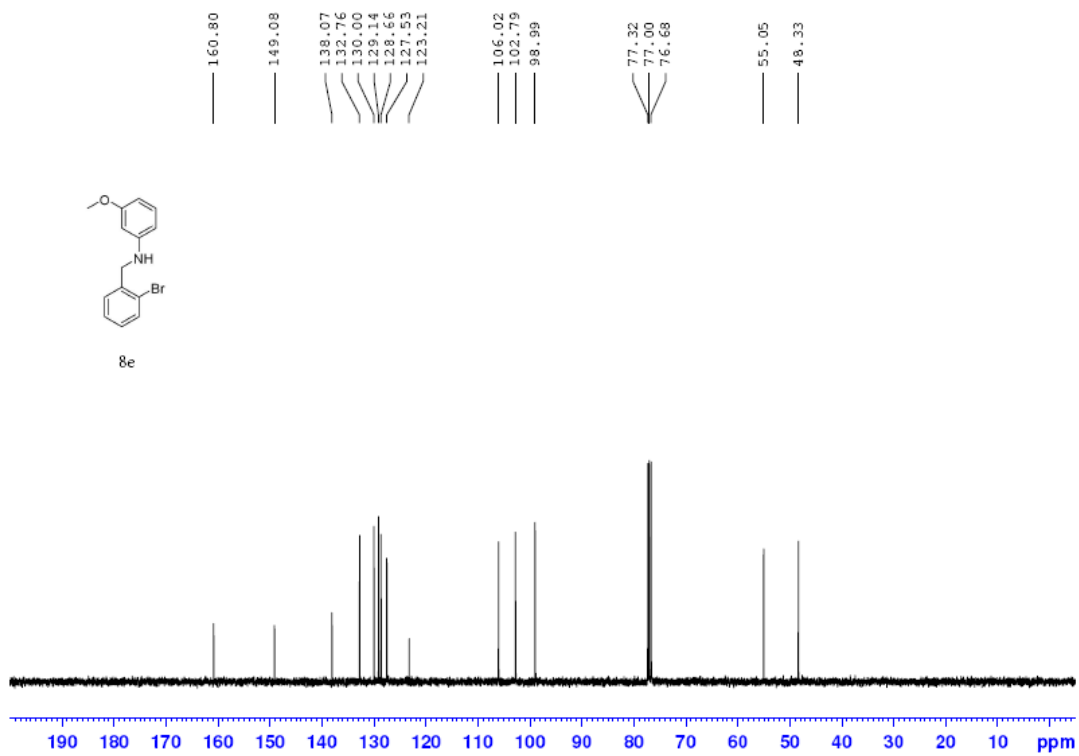

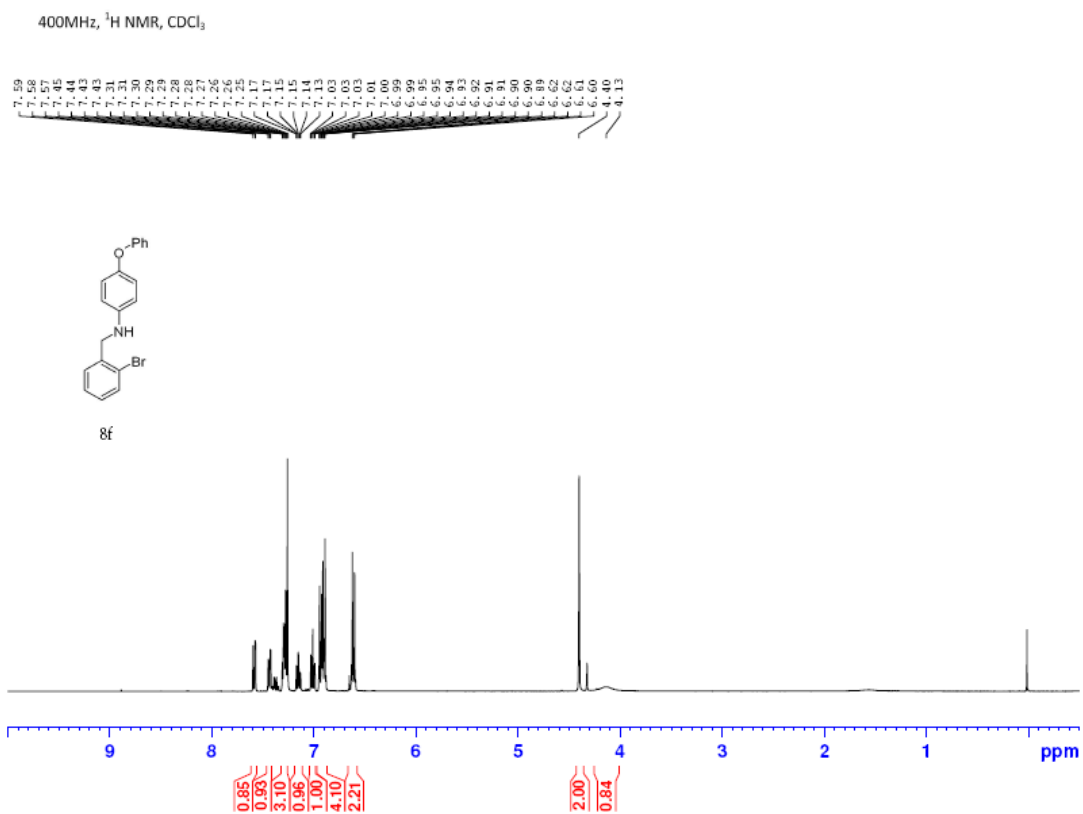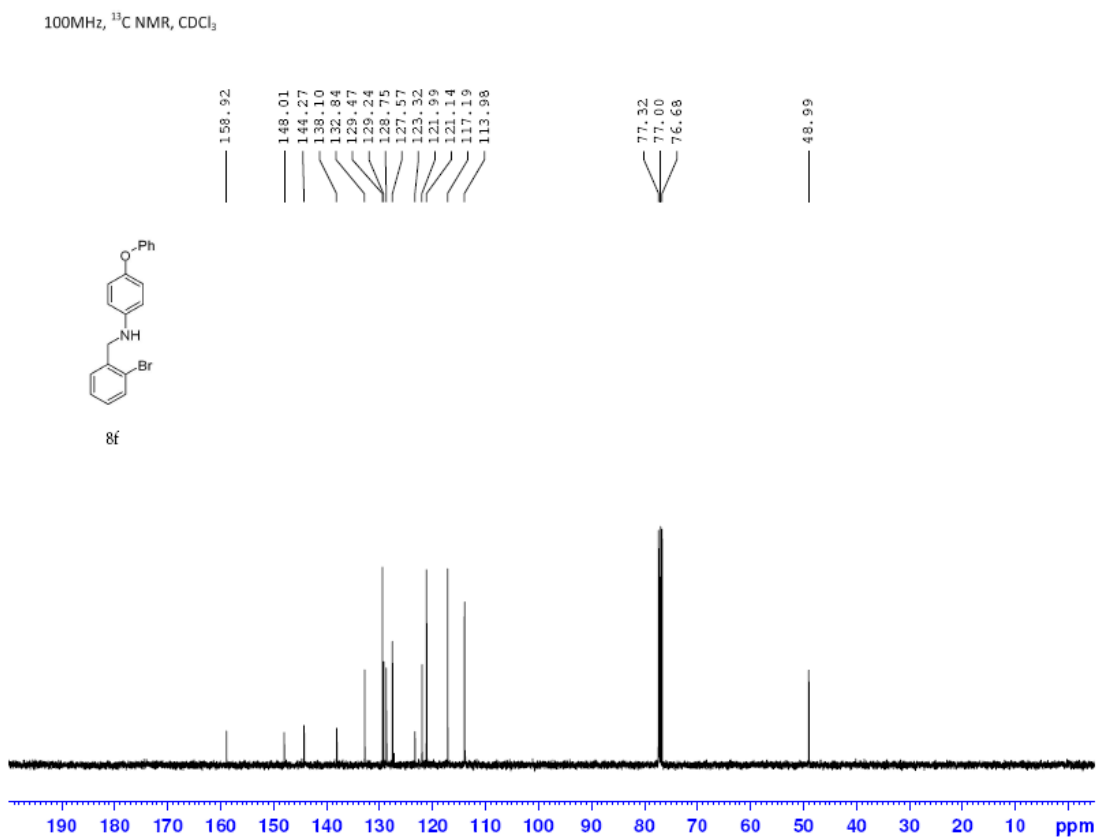

400MHz,  $^1\text{H}$  NMR,  $\text{CDCl}_3$

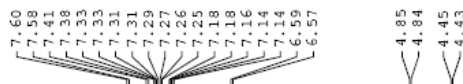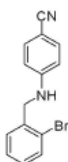

8g

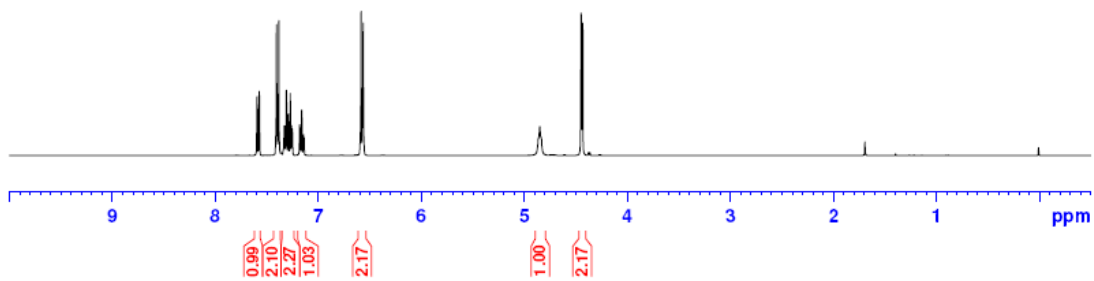

100MHz,  $^{13}\text{C}$  NMR,  $\text{CDCl}_3$

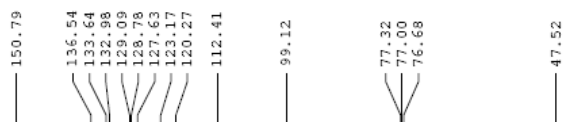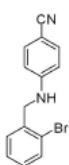

8g

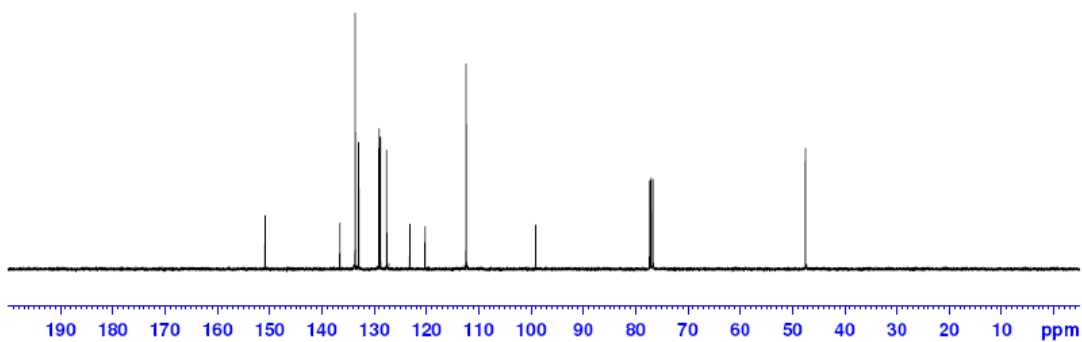



400MHz, <sup>1</sup>H NMR, CDCl<sub>3</sub>

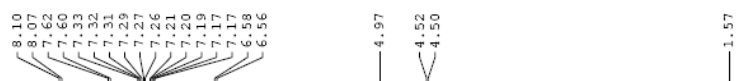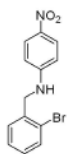

8h

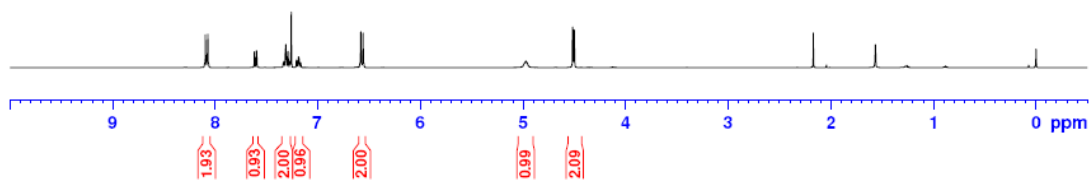

100MHz, <sup>13</sup>C NMR, CDCl<sub>3</sub>

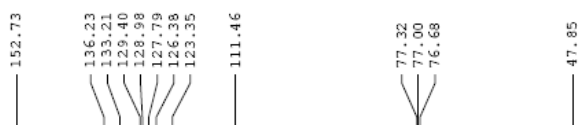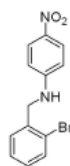

8h

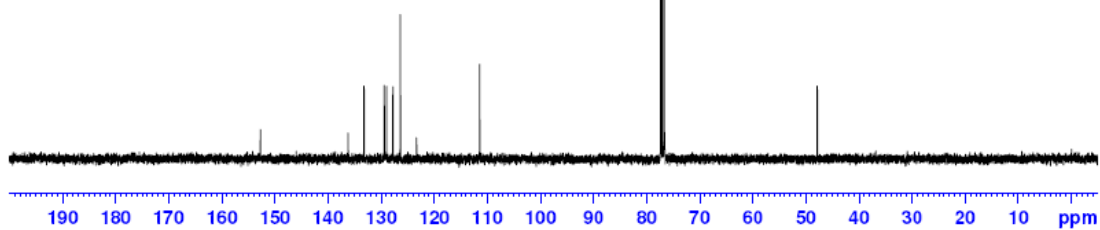

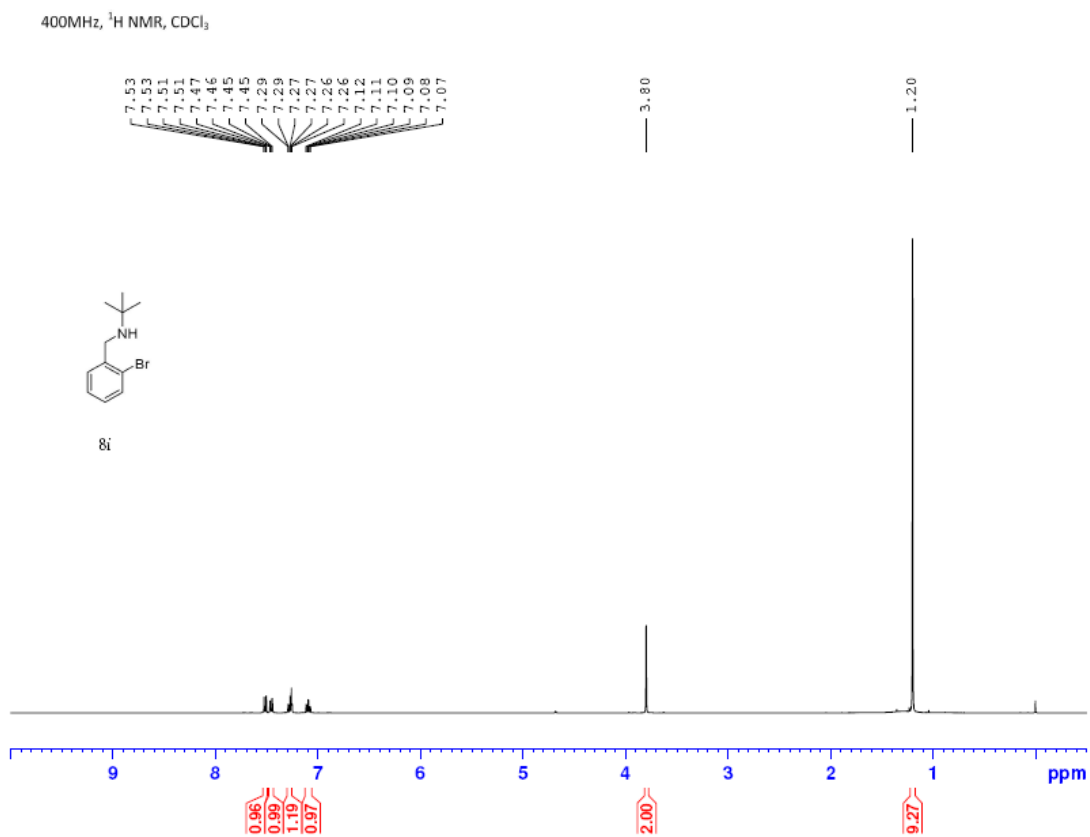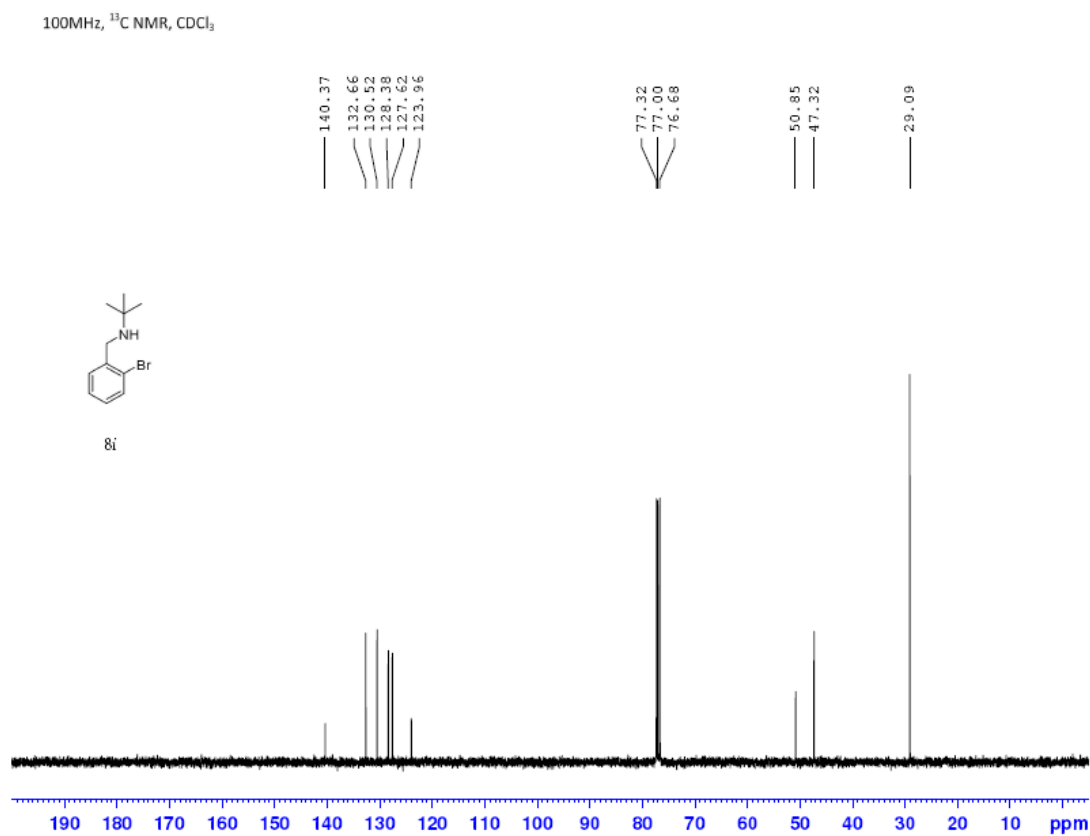

400MHz, <sup>1</sup>H NMR, CDCl<sub>3</sub>

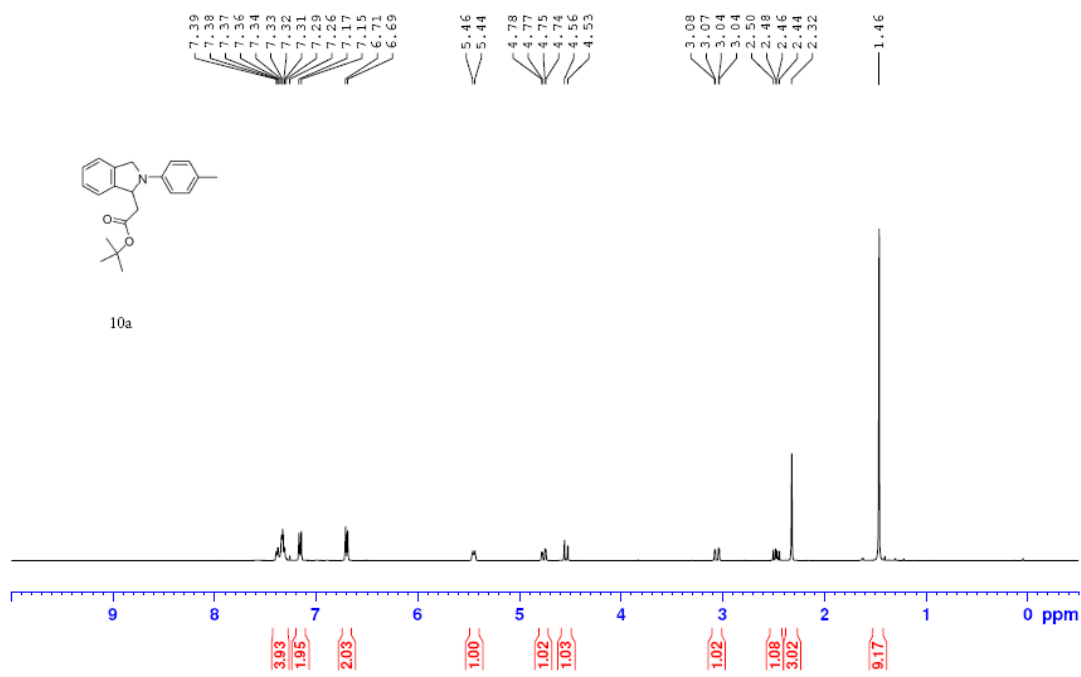

100MHz, <sup>13</sup>C NMR, CDCl<sub>3</sub>

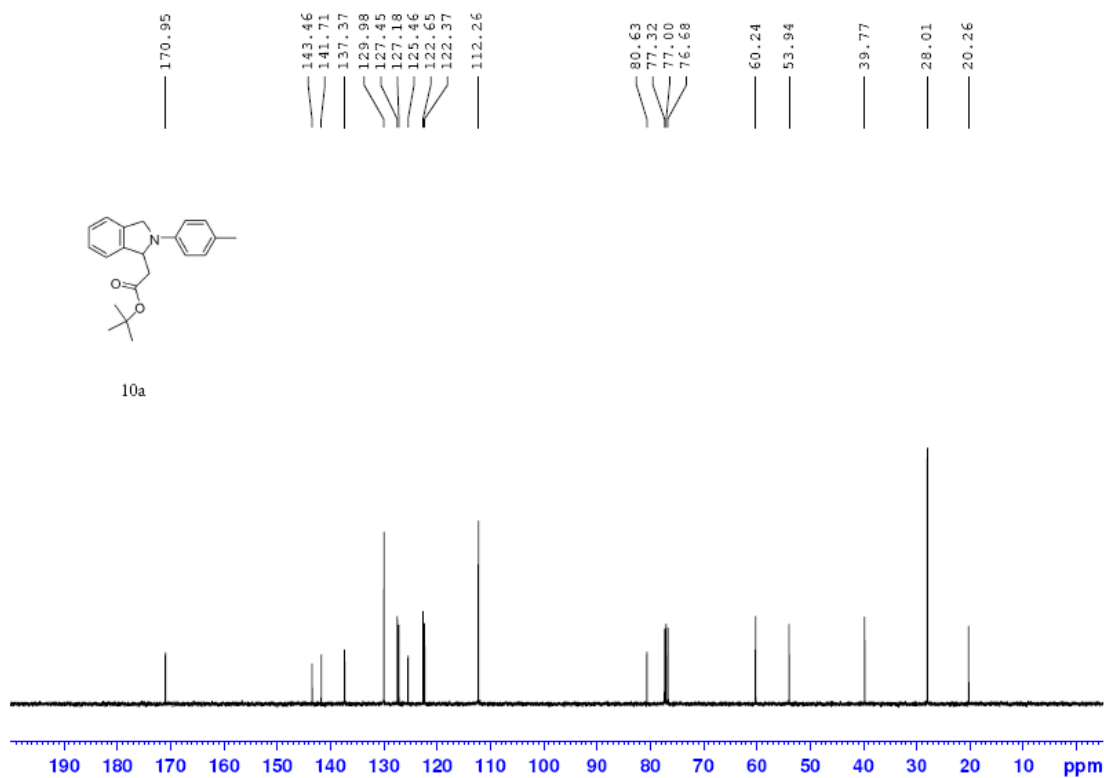

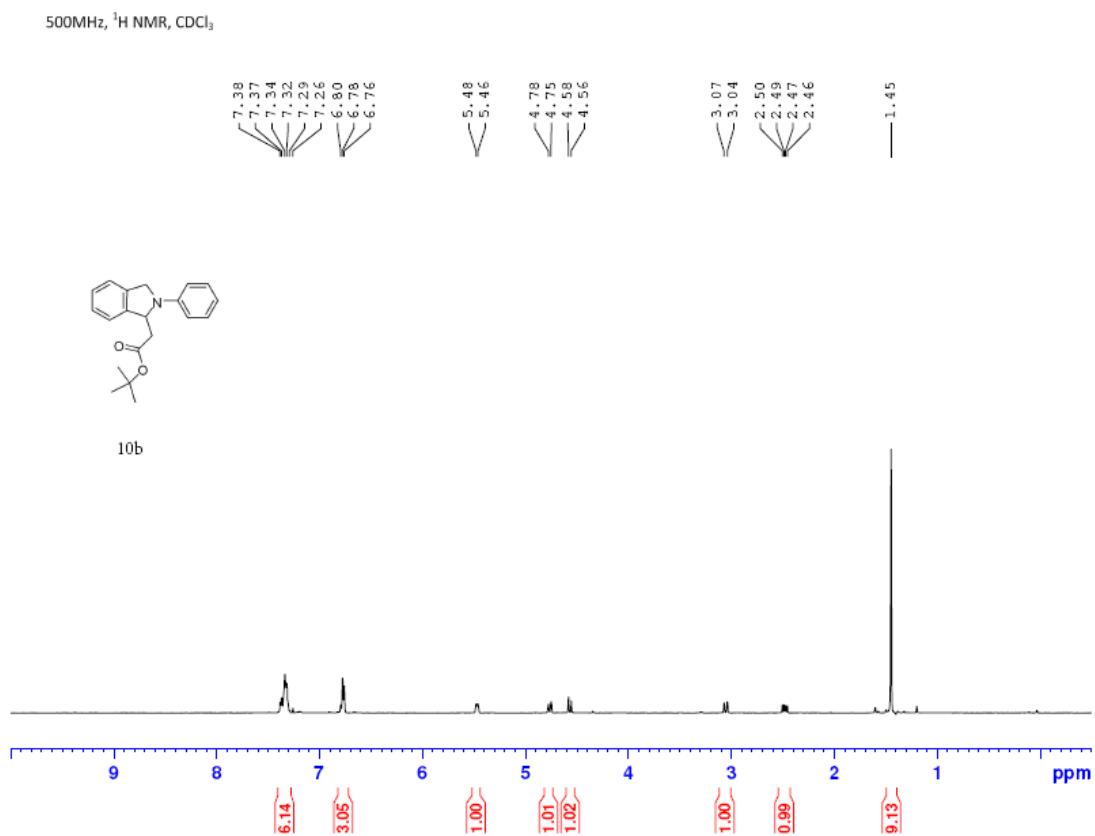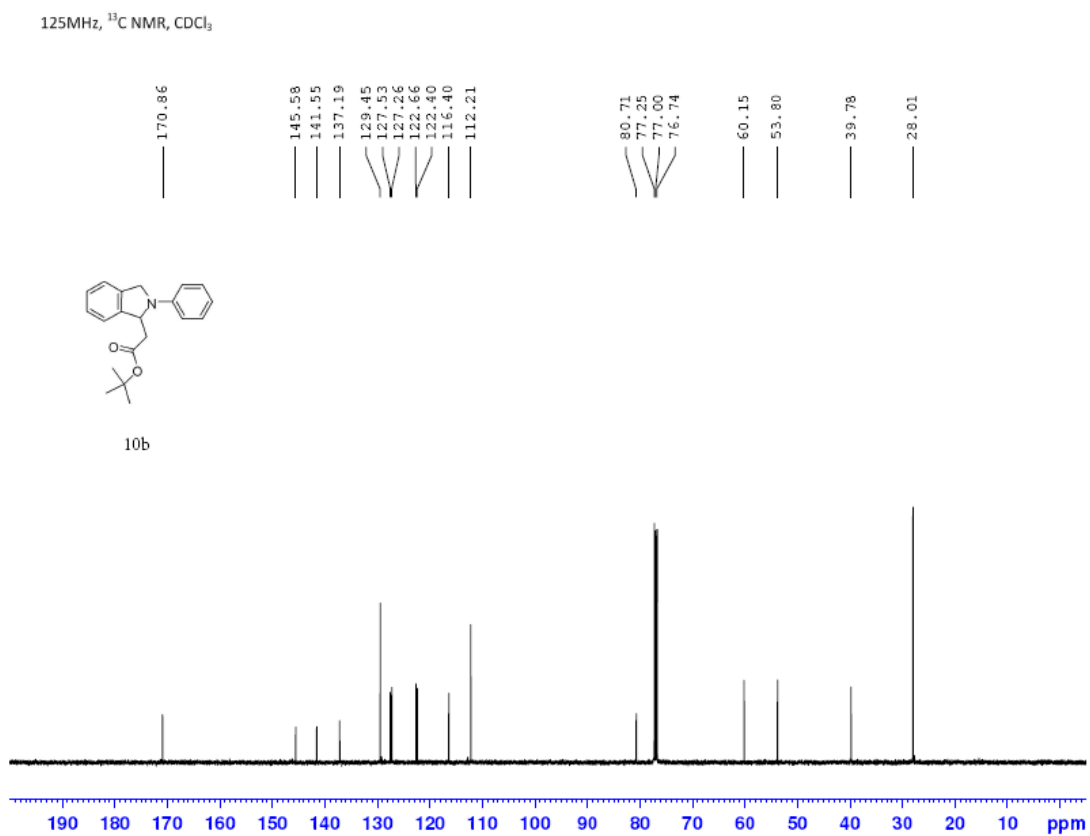

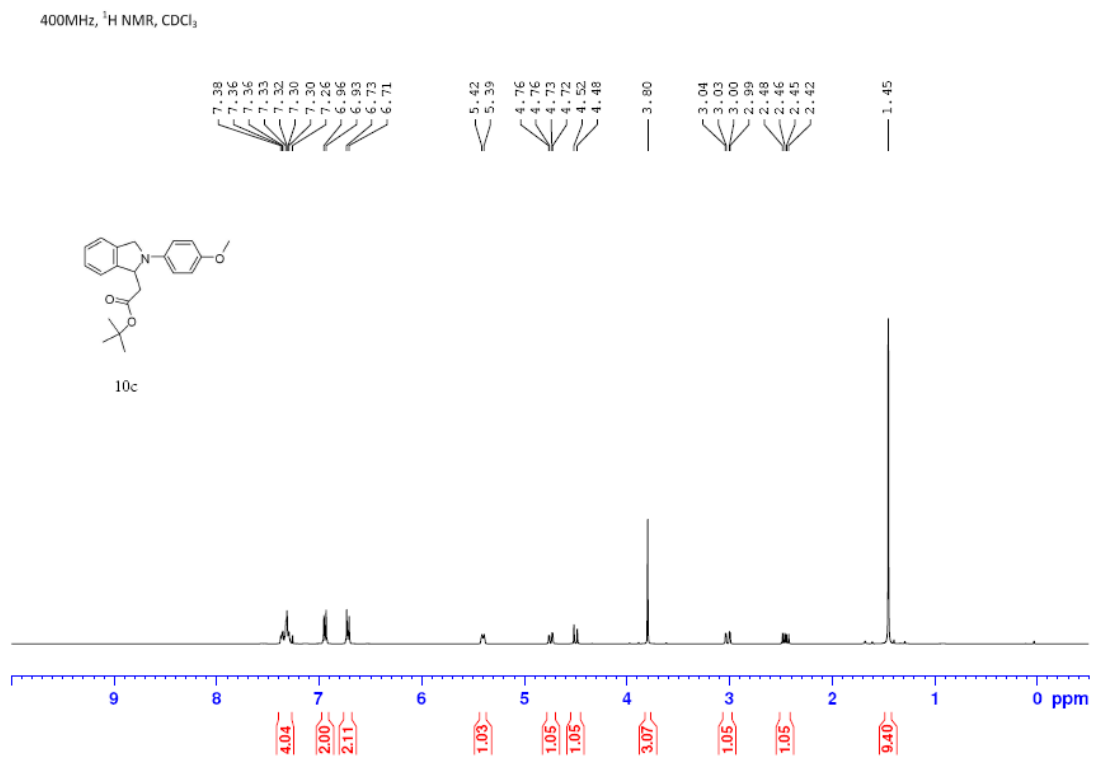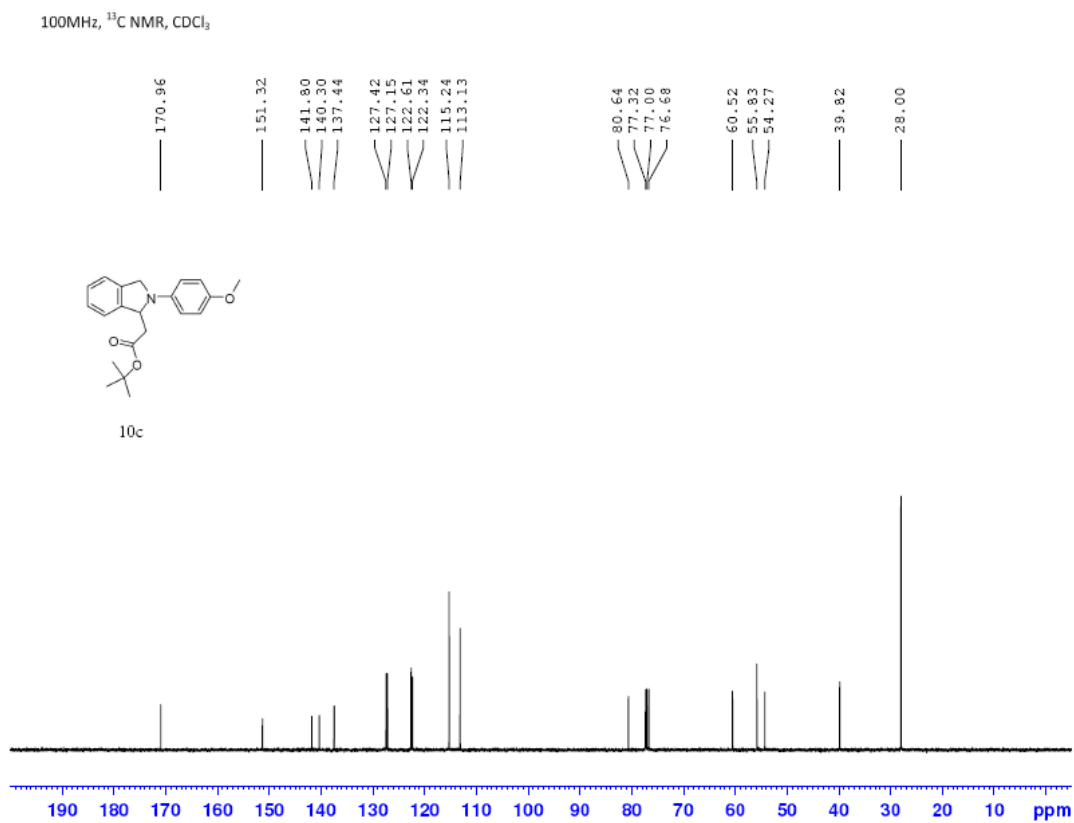

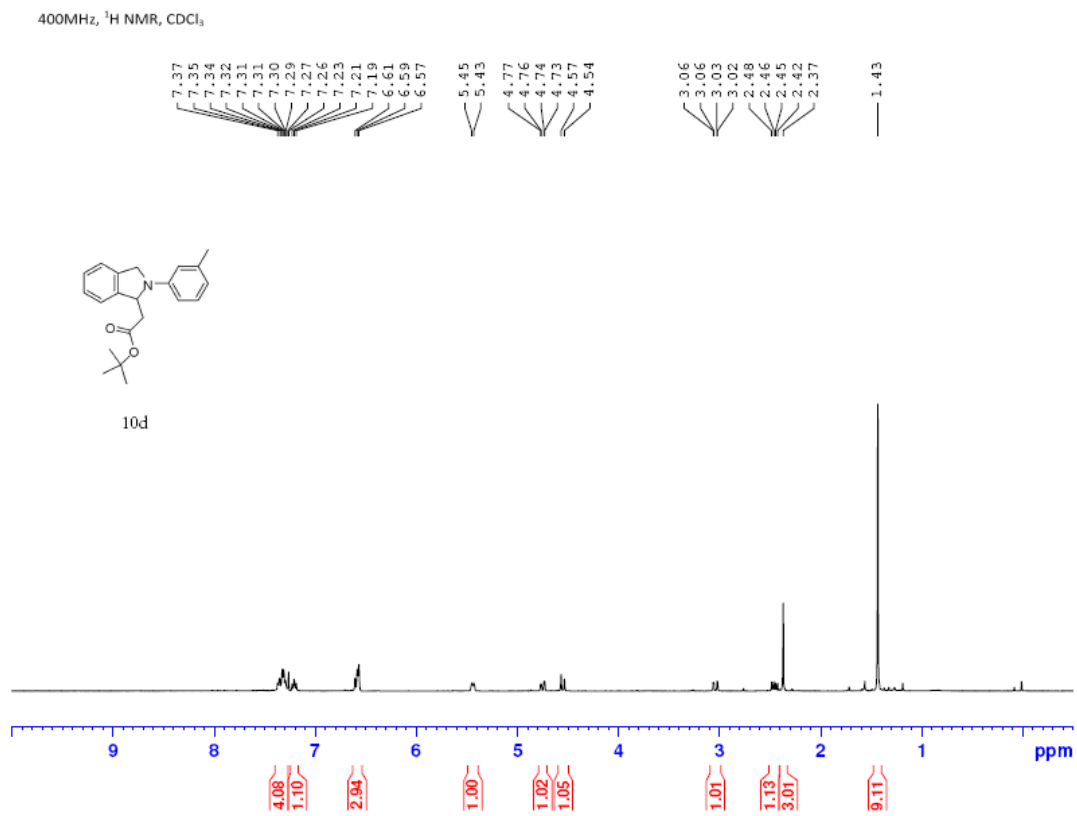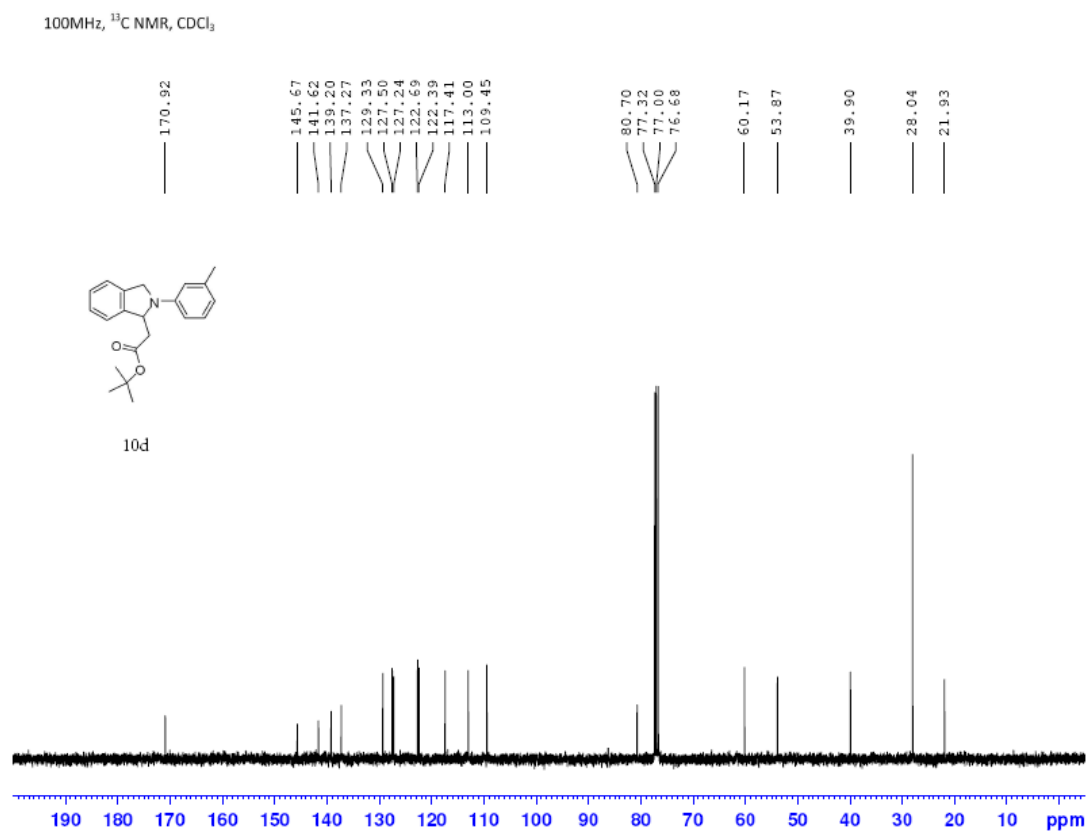

400MHz,  $^1\text{H}$  NMR,  $\text{CDCl}_3$

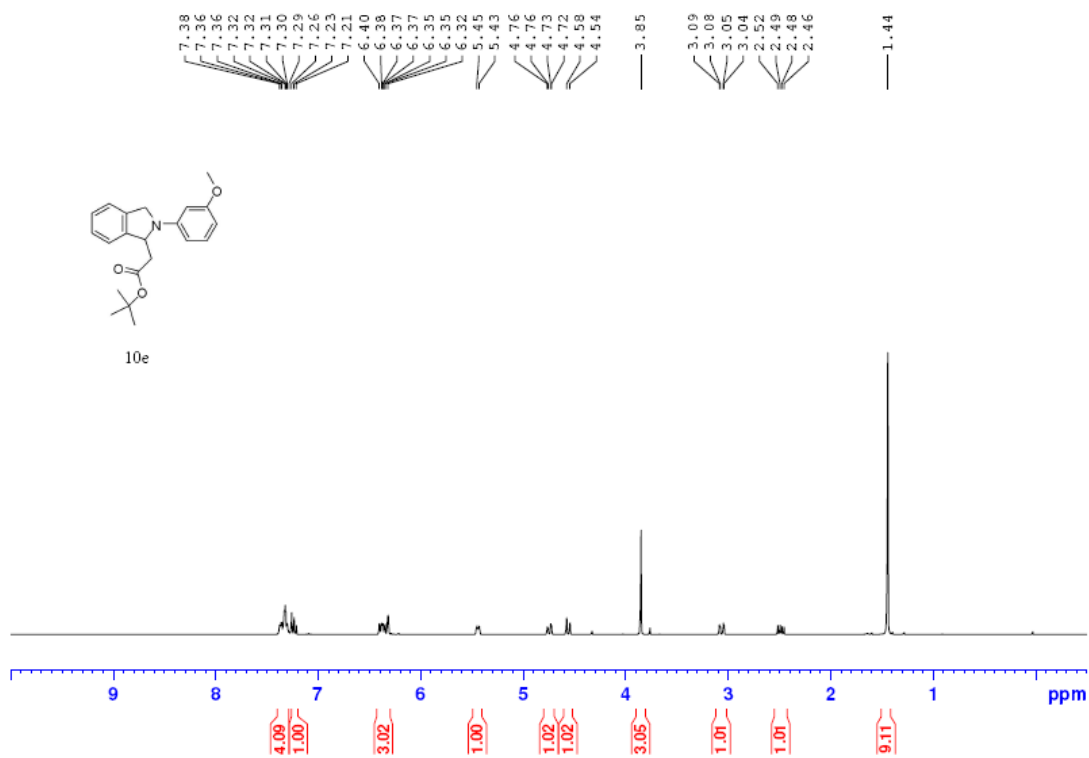

100MHz,  $^{13}\text{C}$  NMR,  $\text{CDCl}_3$

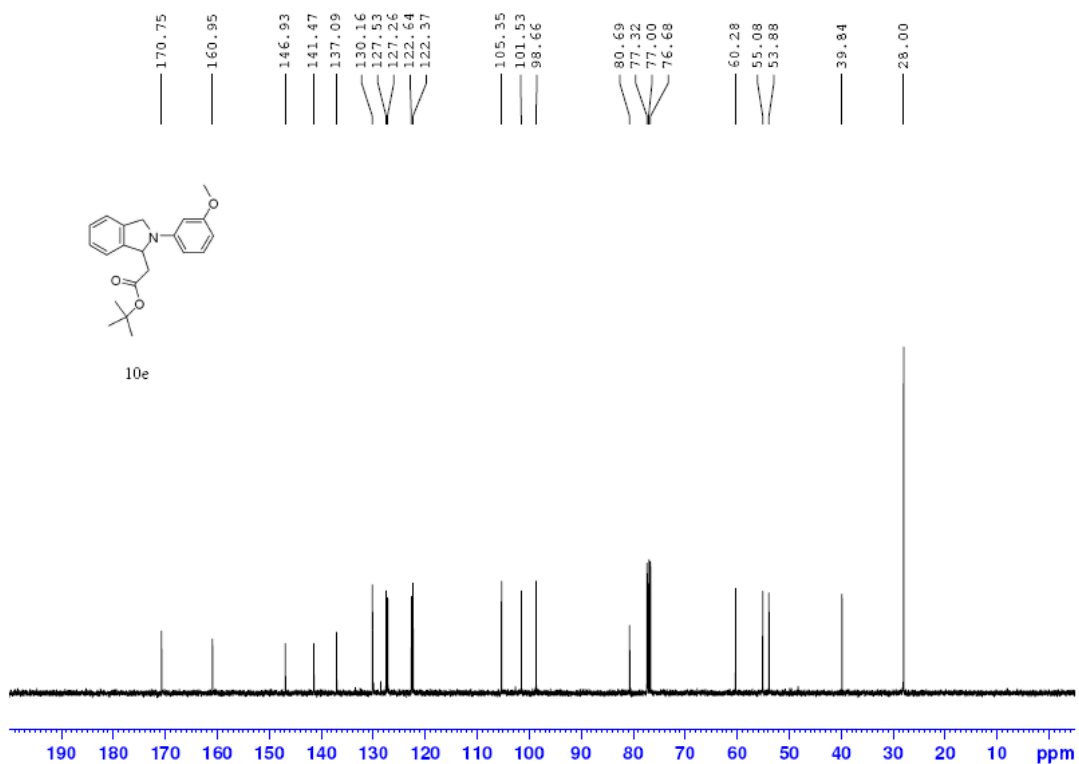

400MHz,  $^1\text{H}$  NMR,  $\text{CDCl}_3$

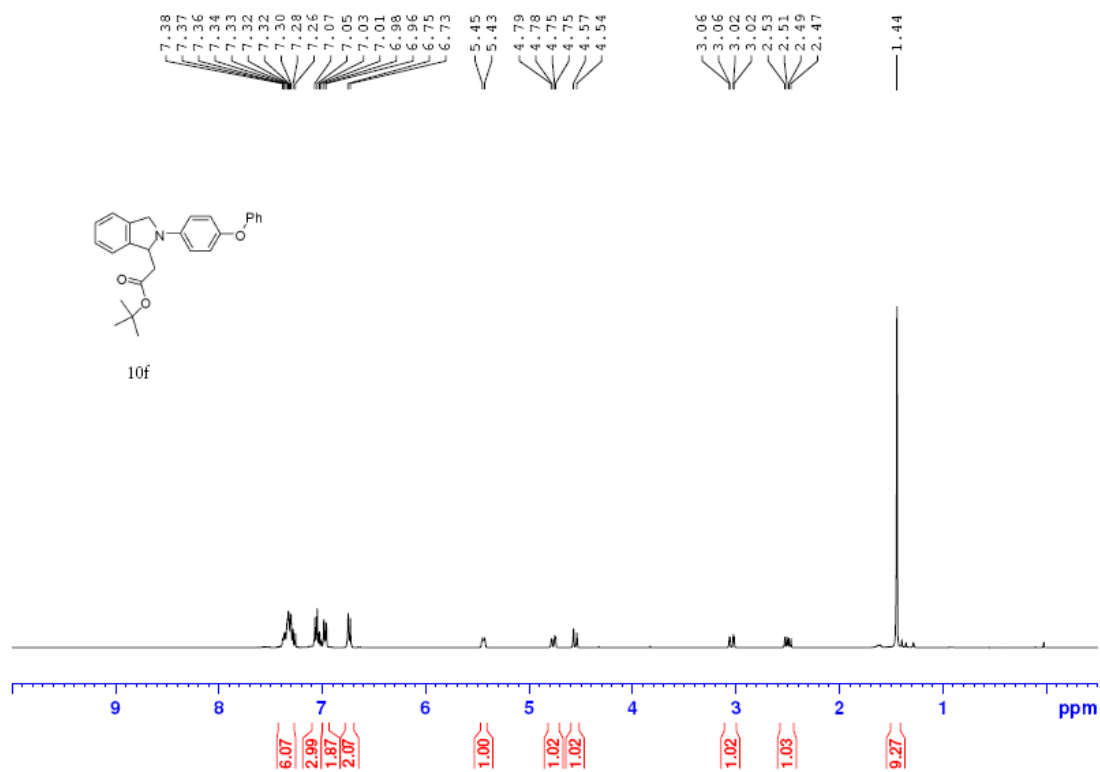

100MHz,  $^{13}\text{C}$  NMR,  $\text{CDCl}_3$

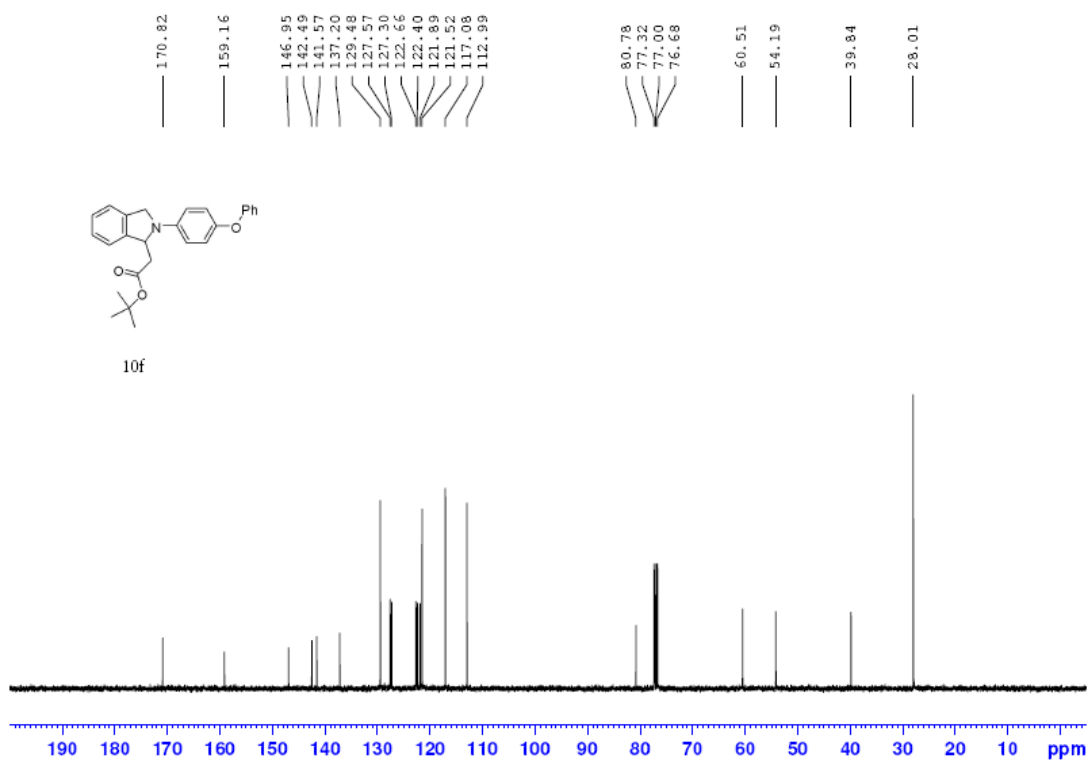



400MHz,  $^1\text{H}$  NMR,  $\text{CDCl}_3$

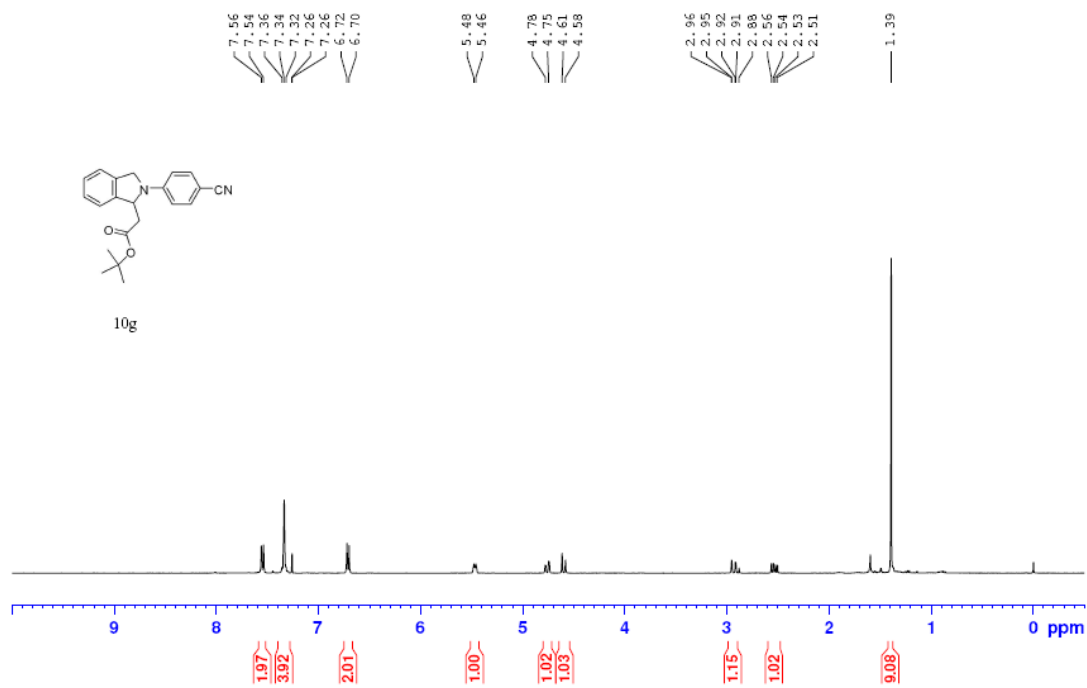

100MHz,  $^{13}\text{C}$  NMR,  $\text{CDCl}_3$

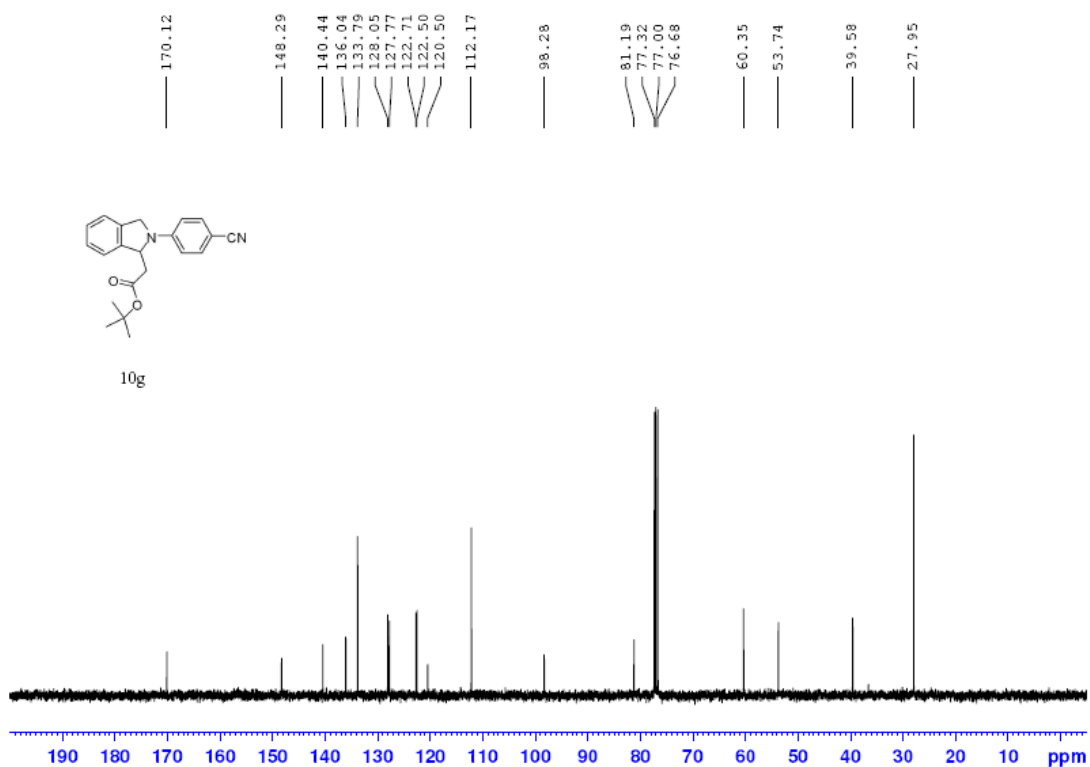

400MHz, <sup>1</sup>H NMR, CDCl<sub>3</sub>

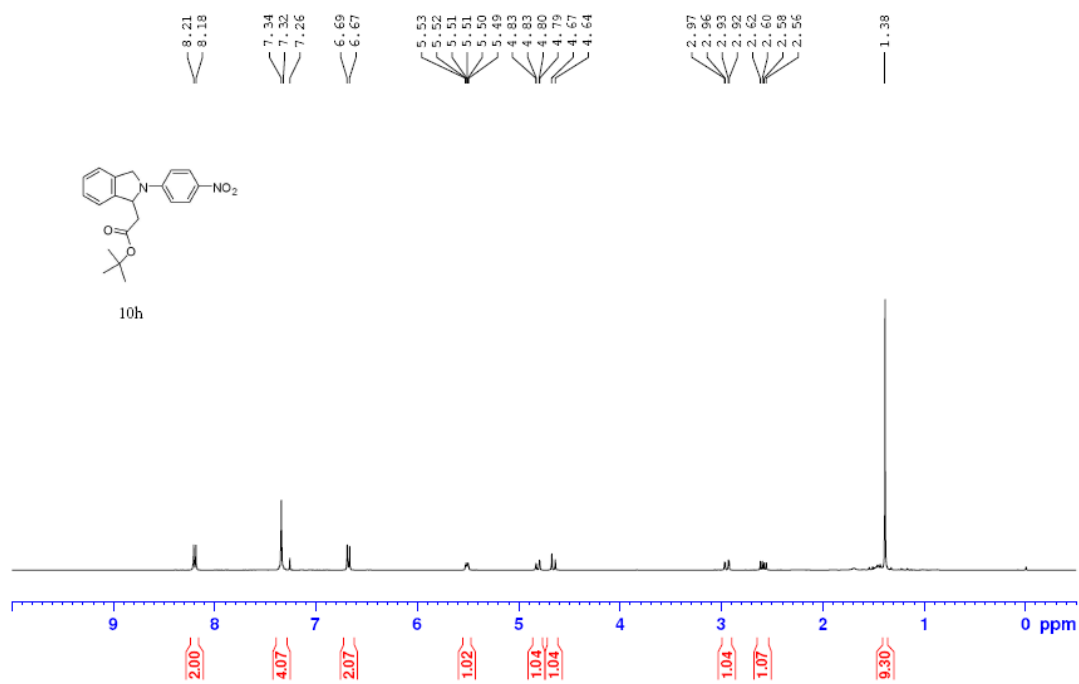

100MHz, <sup>13</sup>C NMR, CDCl<sub>3</sub>

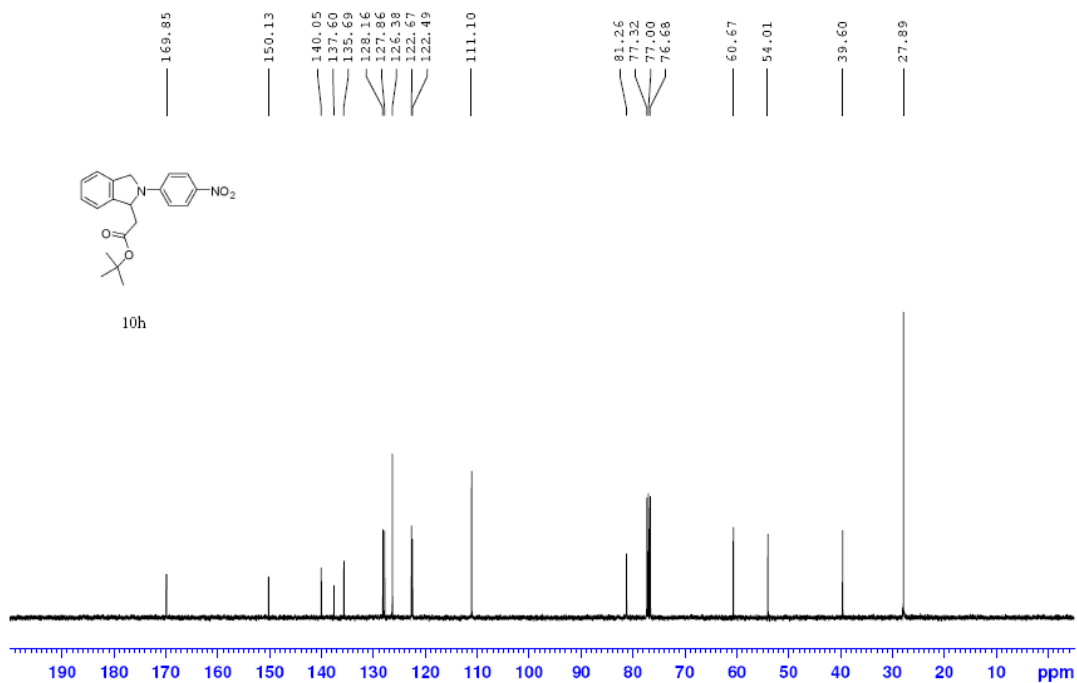

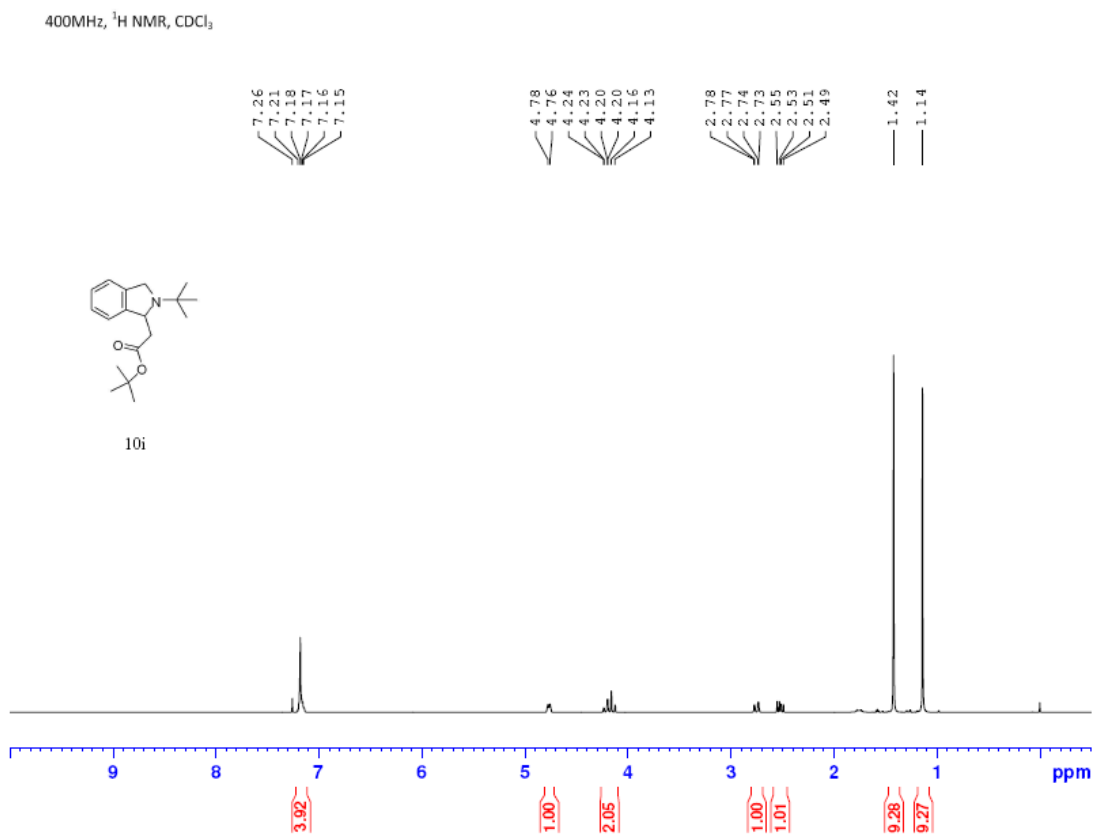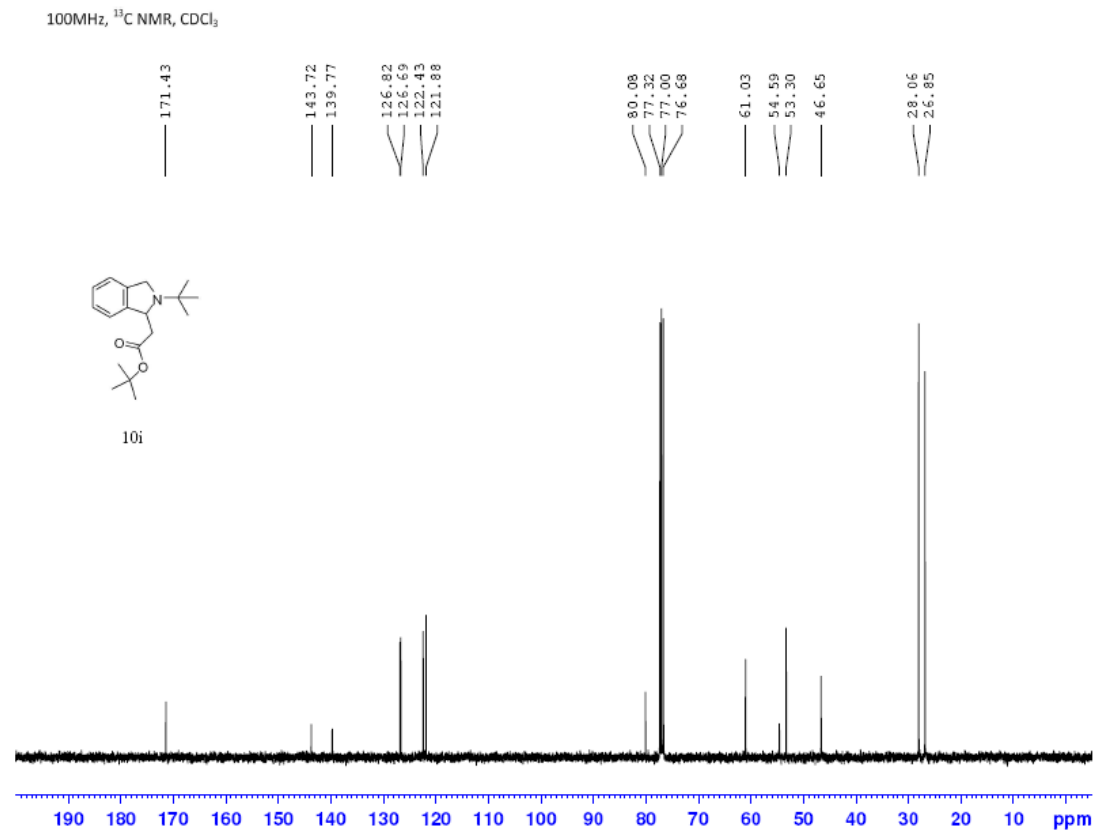

400MHz, <sup>1</sup>H NMR, CDCl<sub>3</sub>

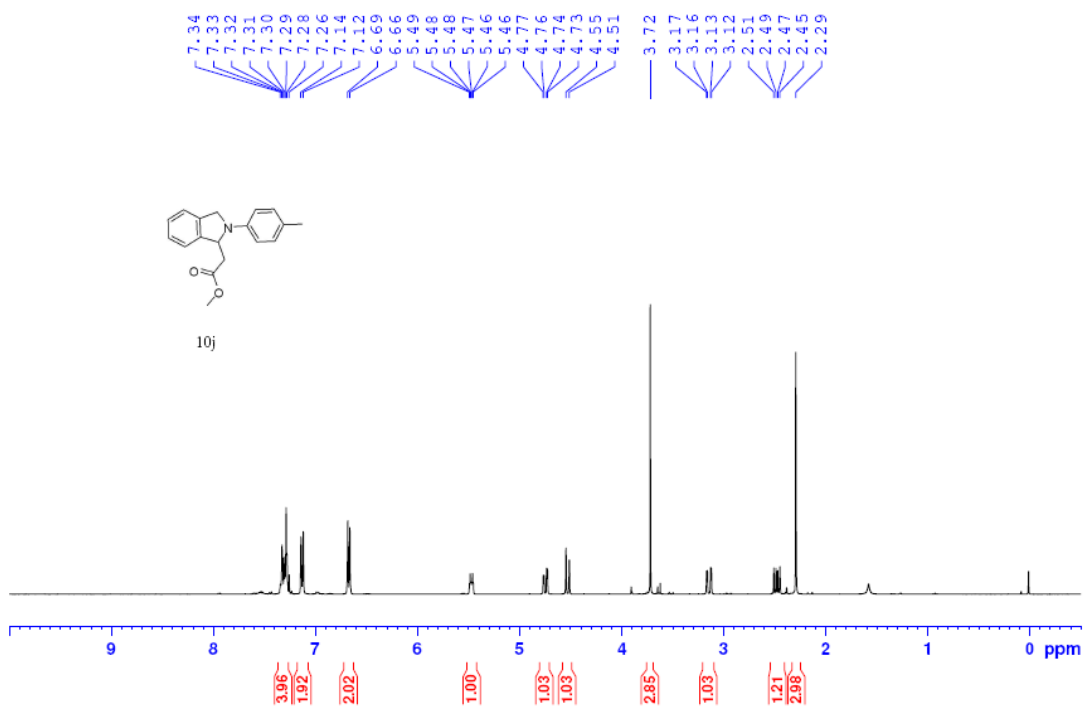

100MHz, <sup>13</sup>C NMR, CDCl<sub>3</sub>

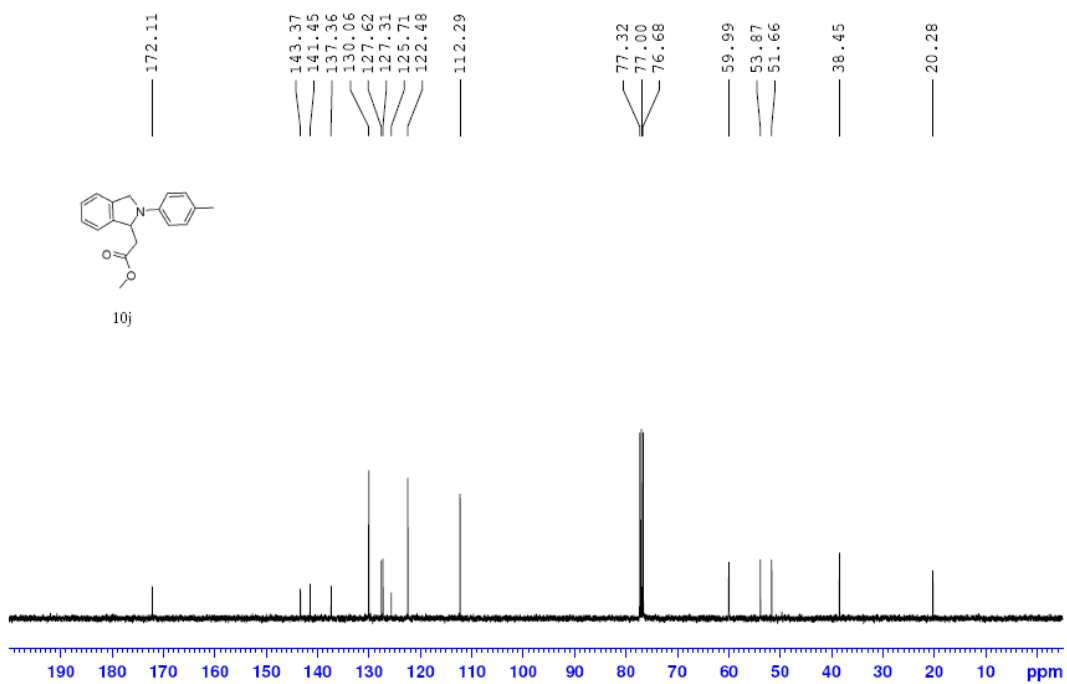

400MHz, <sup>1</sup>H NMR, CDCl<sub>3</sub>

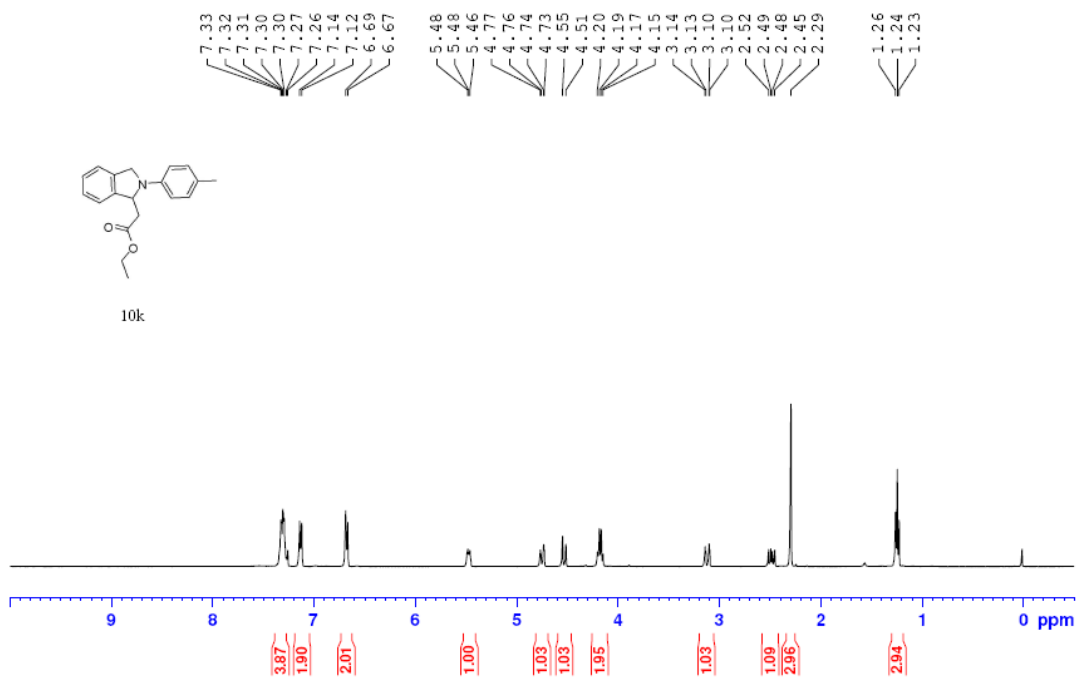

100MHz, <sup>13</sup>C NMR, CDCl<sub>3</sub>

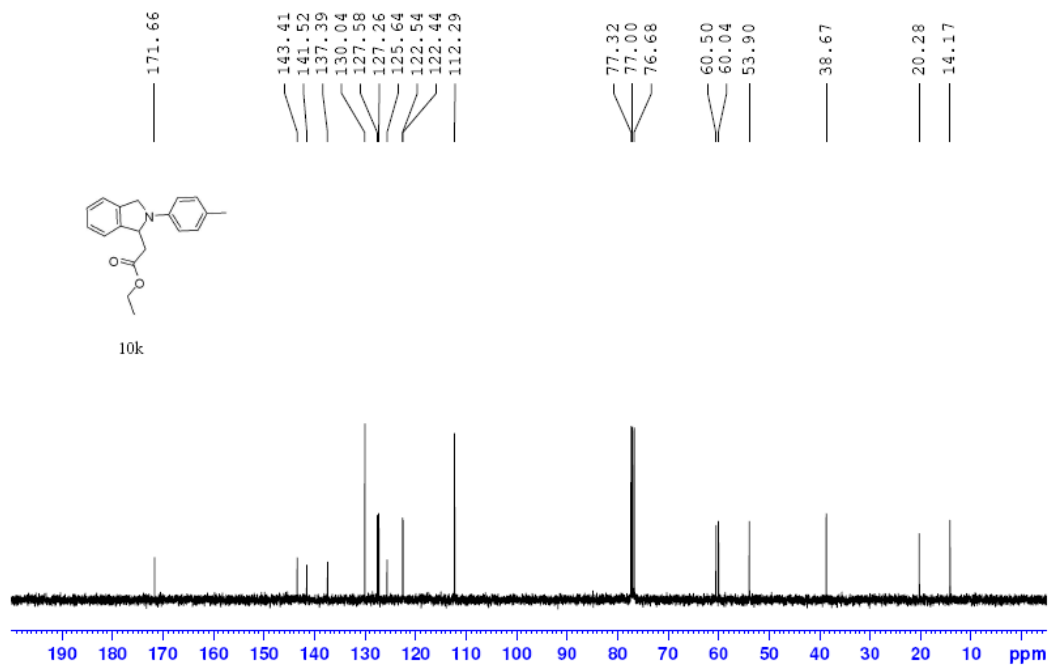

400MHz, <sup>1</sup>H NMR, CDCl<sub>3</sub>

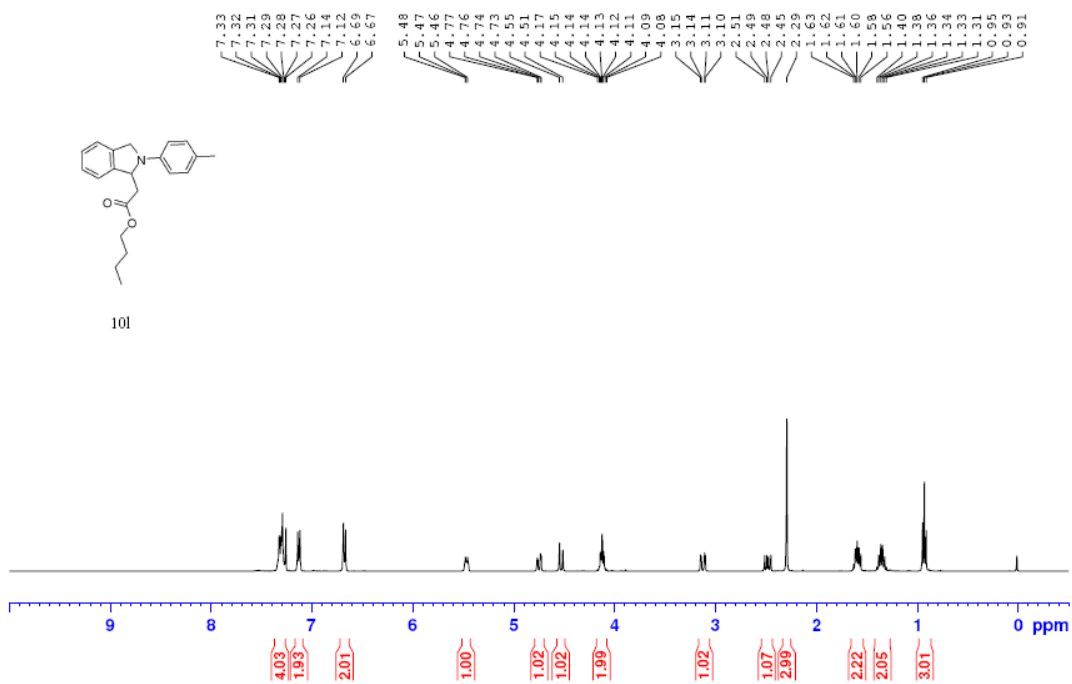

100MHz, <sup>13</sup>C NMR, CDCl<sub>3</sub>

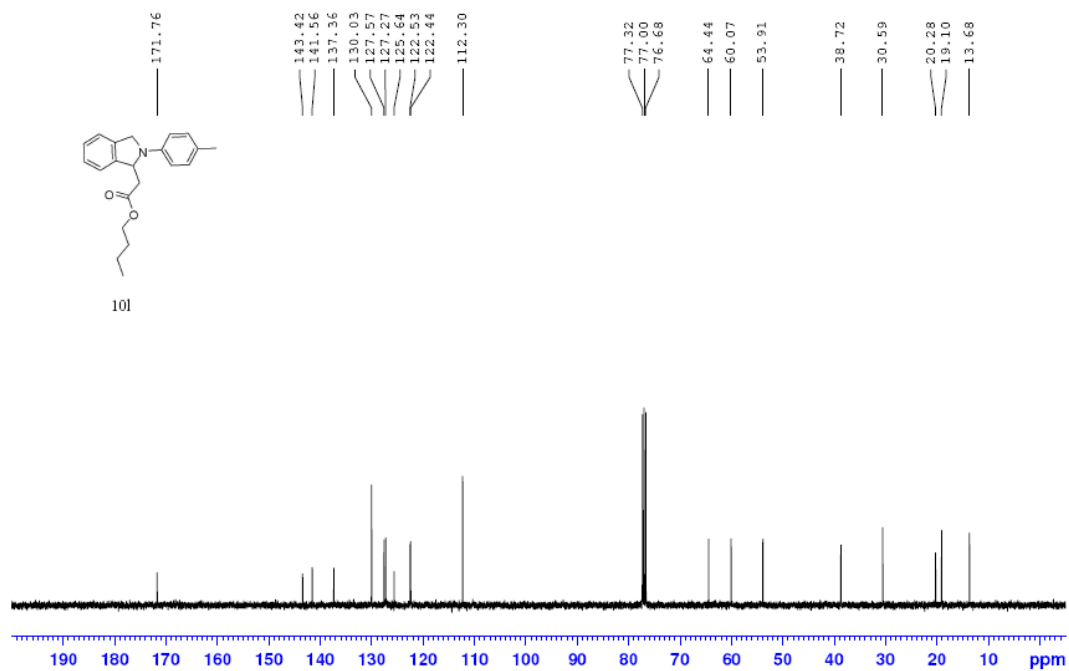

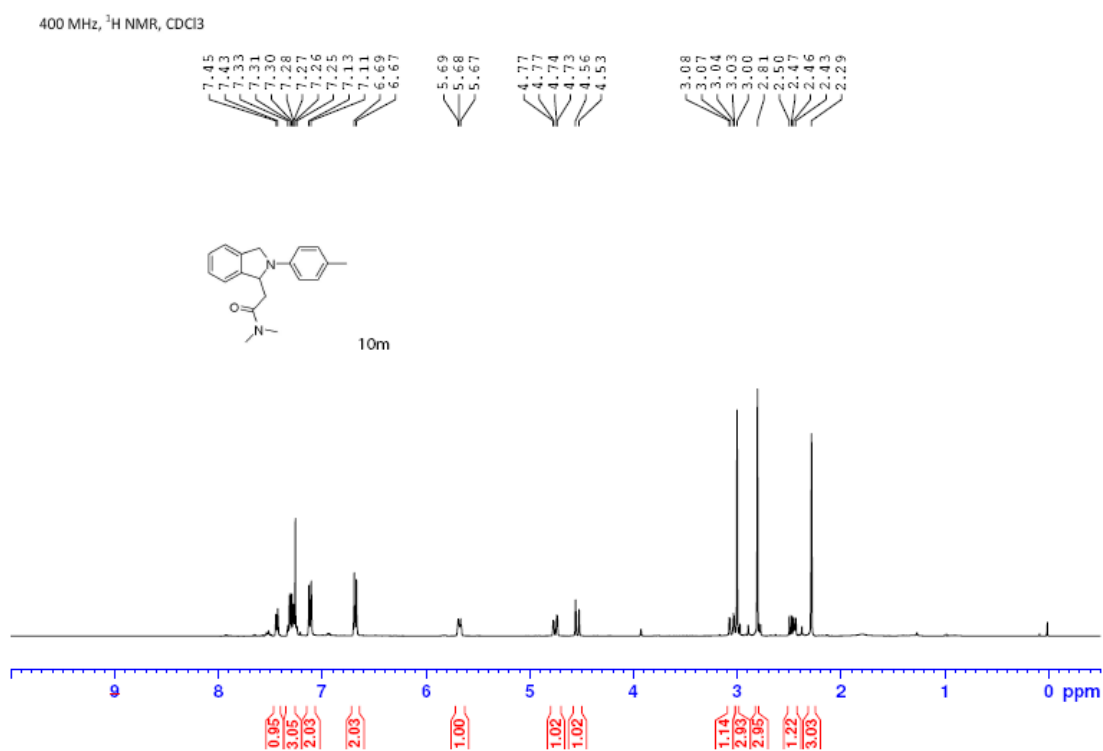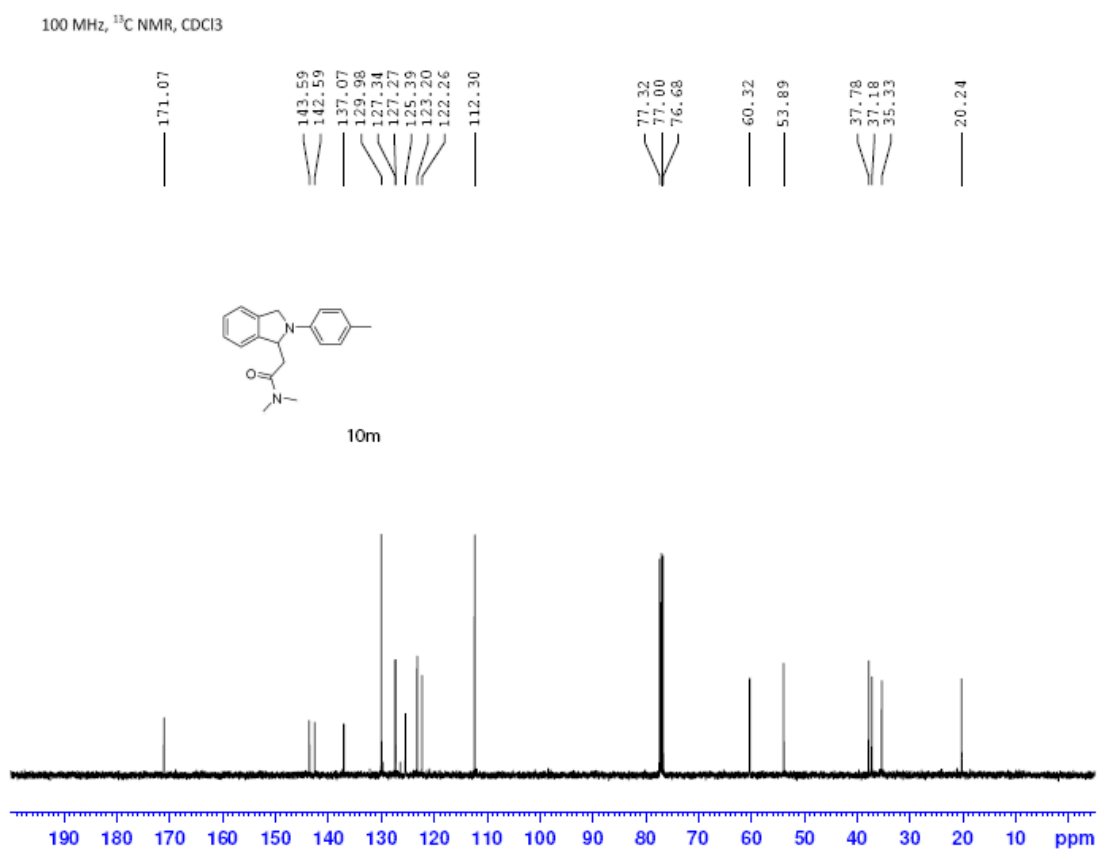

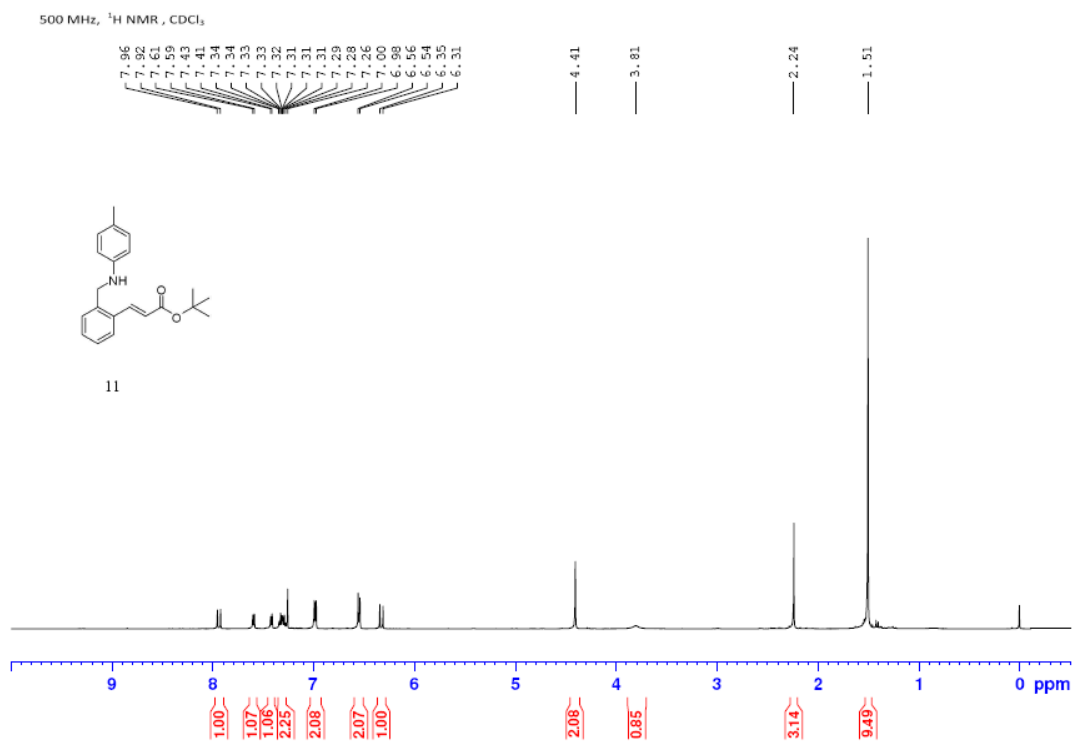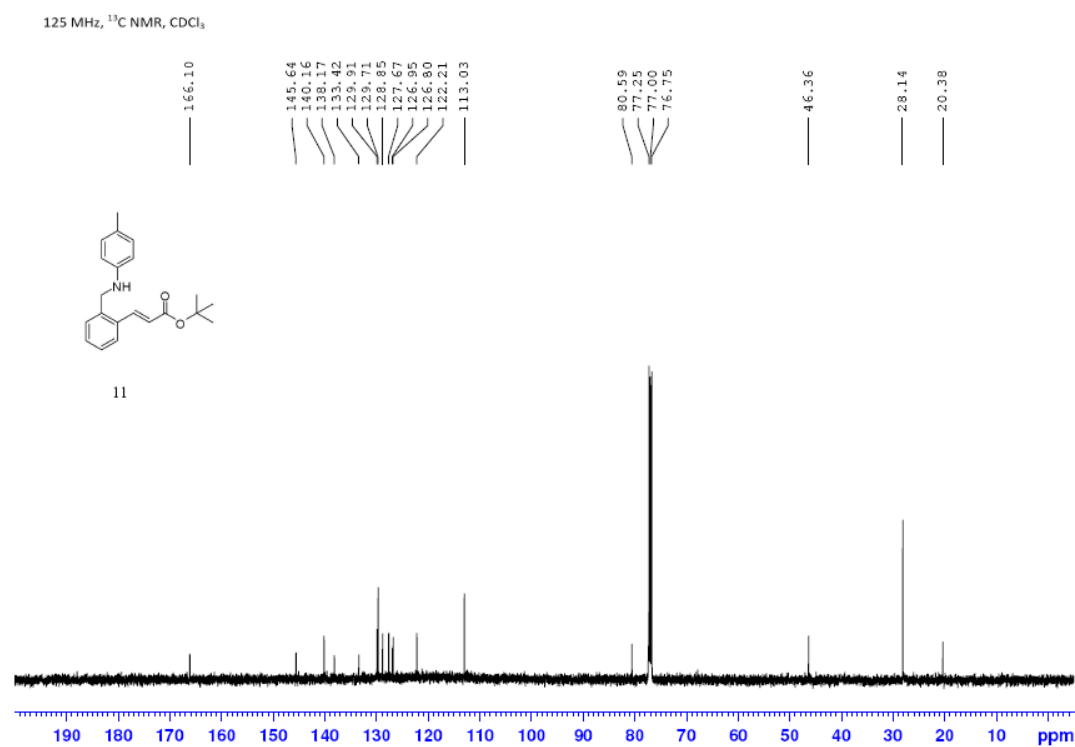



400 MHz,  $^1\text{H}$  NMR,  $\text{CDCl}_3$

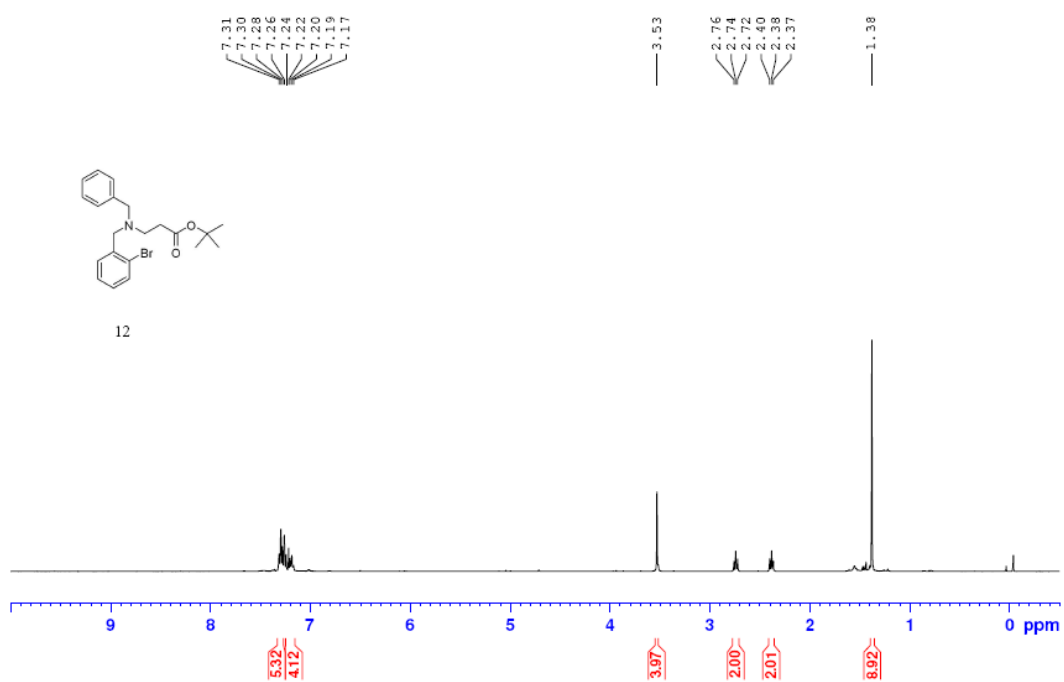

100 MHz,  $^{13}\text{C}$  NMR,  $\text{CDCl}_3$

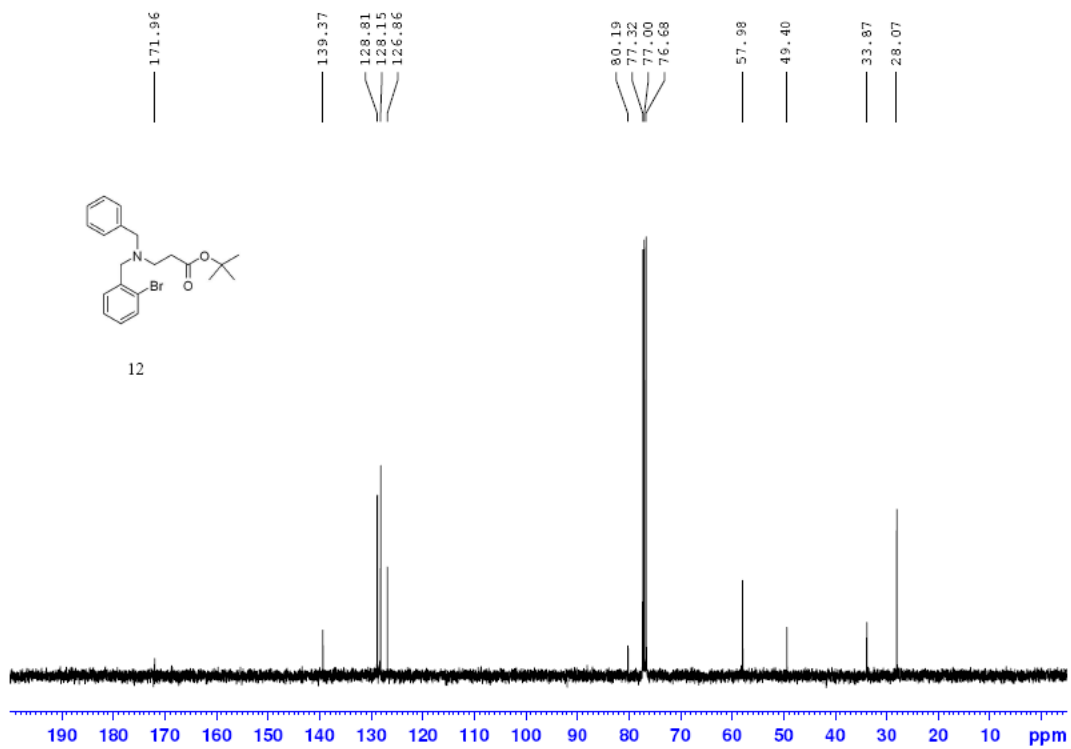

Supplement: c2ob25854d.pdf [file c2ob25854d.pdf]
